# Supplementary material for: MLstructureMining: a machine learning tool for structure identification from X-ray pair distribution functions
Source: Royal Society of Chemistry journal article supplement (doi:10.1039/d4dd00001c), 2024-01-01
Supplement: d4dd00001c1.pdf [file d4dd00001c1.pdf]

**Supplementary Information for:**

**MLstructureMining: A machine learning tool for structure identification from X-ray pair distribution function data**

*Emil T. S. Kjær<sup>1</sup>, Andy S. Anker<sup>1</sup>, Andrea Kirsch<sup>1</sup>, Joakim Lajer<sup>1</sup>, Olivia Aalling-Frederiksen<sup>1</sup>, Simon J. L. Billinge<sup>\*2</sup>, Kirsten M. Ø. Jensen<sup>\*1</sup>*

\*Correspondence to [sb2896@columbia.edu](mailto:sb2896@columbia.edu) (SJLB), [kirsten@chem.ku.dk](mailto:kirsten@chem.ku.dk) (KMØJ)

1: Department of Chemistry and Nano-Science Center, University of Copenhagen, 2100 Copenhagen Ø, Denmark

2: Department of Applied Physics and Applied Mathematics Science, Columbia University, New York, NY 10027, USA

## Table of Contents

|                                                                                                                                                       |           |
|-------------------------------------------------------------------------------------------------------------------------------------------------------|-----------|
| <b>A: The Pair Distribution Function (PDF)</b> .....                                                                                                  | <b>4</b>  |
| <b>B: Training and evaluating the MLstructureMining model</b> .....                                                                                   | <b>4</b>  |
| <i>B.1.: Pair Distribution Function (PDF) simulation parameters</i> .....                                                                             | 4         |
| <i>B.2.: XGBoost hyperparameters</i> .....                                                                                                            | 5         |
| <i>B.3.: Testing robustness of the model using Adversarial Robustness Toolbox (ART)</i> .....                                                         | 6         |
| <b>C: The Pearson Correlation Coefficient (PCC)</b> .....                                                                                             | <b>6</b>  |
| <b>D: Synthesis and data collection:</b> .....                                                                                                        | <b>7</b>  |
| <i>D.1. Example 1: CoFe<sub>2</sub>O<sub>4</sub></i> .....                                                                                            | 7         |
| <i>D.2. Example 2: CeO<sub>2</sub></i> .....                                                                                                          | 7         |
| <i>D.3. Example 3: W<sub>5</sub>O<sub>14</sub></i> .....                                                                                              | 7         |
| <i>D.4. Example 4: Bi<sub>2</sub>Fe<sub>4</sub>O<sub>9</sub></i> .....                                                                                | 8         |
| <b>E: Baseline refinements of experimental PDF's</b> .....                                                                                            | <b>8</b>  |
| <i>E.1. Size estimation of CoFe<sub>2</sub>O<sub>4</sub> and Bi<sub>2</sub>Fe<sub>4</sub>O<sub>9</sub></i> .....                                      | 9         |
| <b>F: Real-space Rietveld refinements of predicted structures</b> .....                                                                               | <b>9</b>  |
| <i>F.1.: CoFe<sub>2</sub>O<sub>4</sub> fit parameters</i> .....                                                                                       | 9         |
| <i>F.2.: CeO<sub>2</sub> fit parameters</i> .....                                                                                                     | 10        |
| <i>F.3.: W<sub>5</sub>O<sub>14</sub> fit parameters</i> .....                                                                                         | 10        |
| <i>F.4.: Bi<sub>2</sub>Fe<sub>4</sub>O<sub>9</sub> fit parameters</i> .....                                                                           | 10        |
| <i>F.5.: Bi<sub>2</sub>Fe<sub>4</sub>O<sub>9</sub> fit parameters for NMF component 1</i> .....                                                       | 10        |
| <b>G: PDF in the cloud (PDFitc) benchmark tests</b> .....                                                                                             | <b>11</b> |
| <i>G.1.: CoFe<sub>2</sub>O<sub>4</sub></i> .....                                                                                                      | 11        |
| <i>G.2.: CeO<sub>2</sub></i> .....                                                                                                                    | 12        |
| <i>G.3.: W<sub>5</sub>O<sub>14</sub></i> .....                                                                                                        | 12        |
| <i>G.4.: Bi<sub>2</sub>Fe<sub>4</sub>O<sub>9</sub></i> .....                                                                                          | 13        |
| <i>G.5.: Bi<sub>2</sub>Fe<sub>4</sub>O<sub>9</sub> NMF component</i> .....                                                                            | 14        |
| <b>H: Structure predictions for CeO<sub>2</sub>, W<sub>5</sub>O<sub>14</sub>, Bi<sub>2</sub>Fe<sub>4</sub>O<sub>9</sub> and NMF component 1</b> ..... | <b>16</b> |
| <b>I: Comparing the PDF of CeO<sub>2</sub> with La<sub>1.2</sub>U<sub>0.8</sub>O<sub>4</sub></b> .....                                                | <b>17</b> |
| <b>J: Real-space Rietveld refinement of Ce constrained structure search for CeO<sub>2</sub></b> .....                                                 | <b>17</b> |
| <b>K: Top-3 structure prediction for every frame in the Bi<sub>2</sub>Fe<sub>4</sub>O<sub>9</sub> <i>in situ</i> experiment</b> .....                 | <b>18</b> |
| <b>L: Structure analysis of the BiFeO<sub>3</sub> intermediate and NMF component 2</b> .....                                                          | <b>18</b> |
| <i>L.1.: Baseline refinement of BiFeO<sub>3</sub> and NMF component 2</i> .....                                                                       | 19        |

|                                                                                                                                                         |           |
|---------------------------------------------------------------------------------------------------------------------------------------------------------|-----------|
| <i>L.2.: Structure predictions for BiFeO<sub>3</sub> and NMF component 2</i> .....                                                                      | 19        |
| <i>L.3.: Real-space Rietveld refinements of predicted structures for BiFeO<sub>3</sub> and NMF component 2</i> .....                                    | 19        |
| <i>L.4.: PDFitc benchmark tests for BiFeO<sub>3</sub> and NMF component of BiFeO<sub>3</sub></i> .....                                                  | 21        |
| <b>M: Principal component analysis and non-negative matrix factorization on <i>in situ</i> Bi<sub>2</sub>Fe<sub>4</sub>O<sub>9</sub> with precursor</b> | <b>23</b> |
| <b>References</b> .....                                                                                                                                 | <b>25</b> |

## A: The Pair Distribution Function (PDF)

A PDF can be interpreted as a weighted histogram of atom – atom distances, and is the Fourier transform of X-ray, neutron or electron total scattering data. To obtain the PDF, the measured scattering intensity,  $I(Q)$ , undergoes corrections for fluorescence, incoherent scattering and normalization.<sup>11,17,18</sup> The PDF or  $G(r)$  is then obtained by calculating the Fourier transformation over a truncated  $Q$ -interval,  $Q_{\min}$  to  $Q_{\max}$  as  $G(r) = \frac{2}{\pi} \int_{Q_{\min}}^{Q_{\max}} Q[S(Q) - 1]\sin(Q \cdot r)dQ$ . Here, the scattering vector  $Q$  is dependent on the wavelength of the incoming beam,  $\lambda$ , and the scattering angle,  $\theta$ , and is defined as  $Q = \frac{4 \cdot \pi \cdot \sin(\theta)}{\lambda}$ .

## B: Training and evaluating the MLstructureMining model

For the training, validation, and testing process of MLstructureMining, 100 Pair Distribution Functions (PDFs) of each of the entries in the structure catalogue were simulated. The simulations were done using Latin hypercube sampling<sup>1</sup> with the parameters shown in Table S1. The objective function of MLstructureMining was a multiclass log loss function.<sup>2</sup>

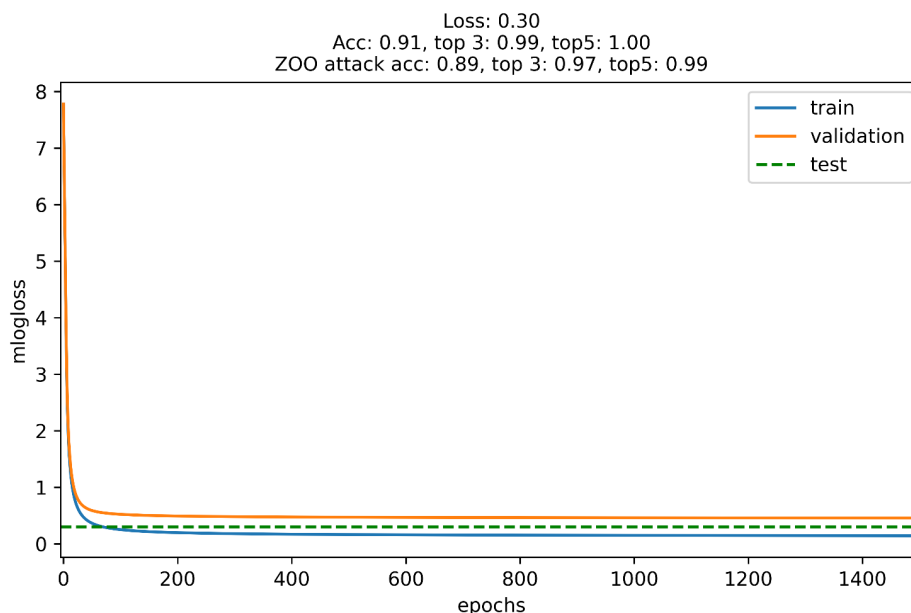

**Figure S1 | Training and validation loss curve of MLstructureMining.** The training (blue) and validation (orange) loss curves shown as a function of epochs. MLstructureMining obtains an accuracy of 91%, a top-3 accuracy of 99% and a top-5 accuracy of 100% on the test seen which were not seen during training. Additionally, MLstructureMining’s robustness was tested using Zeroth-Order Optimization (ZOO), which gave an accuracy of 89%, a top-3 accuracy of 97% and a top-5 accuracy of 99%.

### B.1.: Pair Distribution Function (PDF) simulation parameters

The PDF simulation parameters are shown in Table S1. All PDFs were simulated using the DiffPy-CMI<sup>3</sup> Python library and Latin hypercube sampling<sup>1</sup> was used to sample the PDF simulation parameter space.

**Table S1 | PDF simulation parameter range used for training, validation and testing set.** All parameters only containing one value was not changes for any of the simulations. The unit cell parameter is only varying the dimensions of the unit cell (*a*, *b* and *c* sides) and only if they are allowed to change without breaking the symmetry.

| Parameter                            | Value                     |
|--------------------------------------|---------------------------|
| $R_{\min}$ [Å]                       | 0.00                      |
| $R_{\max}$ [Å]                       | 30.00                     |
| $R_{\text{step}}$ [Å]                | 0.10                      |
| $Q_{\min}$ [Å <sup>-1</sup> ]        | 0.70                      |
| $Q_{\max}$ [Å <sup>-1</sup> ]        | 20.00                     |
| $Q_{\text{damp}}$ [Å <sup>-1</sup> ] | 0.04                      |
| $\delta_2$ [Å <sup>2</sup> ]         | 2.00                      |
| $P_{\text{size}}$ [Å]                | No size dampening applied |
| $U_{\text{iso}}$ [Å <sup>2</sup> ]   | 0.005 – 0.025             |
| Unit cell* [%]                       | ± 4.00                    |
| Number of simulated PDF              | 100                       |

## B.2.: XGBoost hyperparameters

To determine the hyperparameters of MLstructureMining, Bayesian optimization was performed using the bayesian-optimization Python library.<sup>4</sup> The Bayesian optimization was run using 10 'init\_points' and 20 'n\_iter' training a total of 30 models. The allowed range during Bayesian optimization for all hyperparameters are shown in Table S2.

**Table S2 | The hyperparameter range used during Bayesian optimization.**

| Parameter         | Range       |
|-------------------|-------------|
| learning_rate     | (0.05, 1.0) |
| min_child_weight  | (0.1, 10)   |
| max_depth         | (3, 6)      |
| max_delta_step    | (0, 20)     |
| subsample         | (0.01, 1.0) |
| colsample_bytree  | (0.01, 1.0) |
| colsample_bylevel | (0.01, 1.0) |
| reg_lambda        | (0, 10.0)   |
| reg_alpha         | (0, 10.0)   |
| gamma             | (0, 10.0)   |

The hyperparameters used for the best XGBoost<sup>5</sup> classifier model are listed below. Parameters not listed in Table S3 are using default values.

**Table S3 | XGBoost hyperparameter values.**

| Parameter    | Value |
|--------------|-------|
| random_state | 0     |
| num_class    | 6062  |
| tree_method  | hist  |

|                       |                |
|-----------------------|----------------|
| objective             | multi:softprob |
| early_stopping_rounds | 25             |
| eval_metric           | mlogloss       |
| learning_rate         | 0.3            |
| min_child_weight      | 1              |
| max_depth             | 6              |
| max_delta_step        | 0              |
| subsample             | 1              |
| colsample_bytree      | 1              |
| colsample_bylevel     | 1              |
| reg_lambda            | 1              |
| reg_alpha             | 0              |
| gamma                 | 0              |

### B.3.: Testing robustness of the model using Adversarial Robustness Toolbox (ART)

To further evaluate MLstructureMining the Adversarial Robustness Toolbox (ART)<sup>6</sup> was utilized to test its robustness. Here, Zeroth-Order Optimization (ZOO) was deployed to perform adversarial attacks on the model. The ZOO attack was performed using the test data.

ZOO is an adversarial attack technique that can find weaknesses in a model without having direct access to the model's intricate details. Instead of requiring direct access to the model's internal components, ZOO approximates the model's behavior using only its outputs. By probing the model with various inputs and observing the outputs, ZOO can craft adversarial examples that deceive the model, all without ever peeking inside it. In essence, ZOO is making small changes to the data to test the model's robustness. The parameters used for ZOO are shown in Table S4.

In our study, we utilized the ART library to deploy the ZOO attack on our model, emphasizing the importance of robust machine learning practices.

**Table S4 | Input values for ZOO attack.**

| Parameter           | Value |
|---------------------|-------|
| confidence          | 0.0   |
| targeted            | False |
| learning_rate       | 1e-1  |
| max_iter            | 10    |
| binary_search_steps | 3     |
| initial_const       | 0.001 |
| abort_early         | True  |
| use_resize          | False |
| use_importance      | False |
| nb_parallel         | 1     |
| batch_size          | 1     |
| variable_h          | 0.2   |

### C: The Pearson Correlation Coefficient (PCC)

We use the PCC to obtain a discrete measure of comparison between two continuous functions, PDFs. By providing two equally r-sampled PDFs the PCC will return a value between -1 and 1. A value of 1

corresponds to a perfect linear correlation between the two PDF's. -1 indicates the exact opposite relationship between the two functions. The PCC is defined as shown below:<sup>7</sup>

$$r = \frac{1}{1-n} \sum_{i=0}^n \left( \frac{X_i - \bar{X}}{\sigma_x} \right) \left( \frac{Y_i - \bar{Y}}{\sigma_y} \right)$$

The two compared datasets are denoted X and Y. We sum over all points in the two datasets.  $\bar{X}$  and  $\bar{Y}$  are the mean values of the functions while  $\sigma_x$  and  $\sigma_y$  are their standard deviation. The PCC is scale invariant which makes it ideal for comparing the peak positions of various functions. This results in the PCC being highly sensitive to shifts in peak positions (lattice parameters) and not sensitive to peak intensities (different atomic species). Using the PCC as a measure of similarity between PDF data has been done in multiple occasions.<sup>8-10</sup>

## D: Synthesis and data collection:

### D.1. Example 1: CoFe<sub>2</sub>O<sub>4</sub>

Cobalt iron oxide was synthesized using a hydrothermal synthesis approach. 0.5 mmol CoCl<sub>2</sub> · 6H<sub>2</sub>O (ACS reagent, 98%) and 1.0 mmol Fe(NO<sub>3</sub>)<sub>3</sub> · 9H<sub>2</sub>O (ACS reagent, ≥98 %) were added to water. 1.0 mmol KOH (ACS reagent, ≥ 85%) was added and the solution was sonicated for 30 min, transferred to a Teflon lined autoclave and heated for 2 hours at 60 °C followed by 1 hour at 160 °C. The autoclave was cooled down and the formed powder washed first in pure hexane followed by a mixture of hexane and ethanol (1:3) and dried overnight in ethanol.

X-ray total scattering data were collected using a Panalytical Empyrean Series 2 diffractometer equipped with an Ag-source with X-ray wavelength 0.56 Å and a GaliPIX detector. The PDF was generated using PDFgetX<sup>311</sup> with  $Q_{\min} = 1.6 \text{ \AA}^{-1}$  and  $Q_{\max} = 17.5 \text{ \AA}^{-1}$ ,  $Q_{\text{damp}} = 0.04 \text{ \AA}^{-1}$  and  $r_{\text{poly}} = 0.9 \text{ \AA}$ .

### D.2. Example 2: CeO<sub>2</sub>

[Ce<sub>6</sub>(μ<sub>3</sub>-O)<sub>4</sub>(μ<sub>3</sub>-OH)<sub>4</sub>(NH<sub>3</sub>CH<sub>2</sub>COO)<sub>8</sub>(NO<sub>3</sub>)<sub>4</sub>(H<sub>2</sub>O)<sub>6</sub>]Cl<sub>8</sub> · 8H<sub>2</sub>O crystals were dissolved in DMSO at 80 °C until fully dissolved. 0.05 M NaOH were added while stirring vigorously for 3 minutes. The powder was lastly annealed at 60 °C for 3 hours. The powder was transferred to a Kapton tube with an inner diameter of 1.05 mm and X-ray total scattering data were collected using the RA-PDF geometry with x-ray wavelength 0.2072 Å at beamline P02.1 at PETRAIII, DESY, Hamburg. The data were integrated using Fit2D,<sup>12</sup> and PDFs were obtained using PDFgetx3 using  $Q_{\min} = 0.7 \text{ \AA}^{-1}$  and  $Q_{\max} = 24 \text{ \AA}^{-1}$ ,  $Q_{\text{damp}} = 0.04 \text{ \AA}^{-1}$  and  $r_{\text{poly}} = 0.9 \text{ \AA}$ .<sup>11</sup>

### D.3. Example 3: W<sub>5</sub>O<sub>14</sub>

The data presented in the article is the last frame of an *in situ* PDF series on the formation of W<sub>5</sub>O<sub>14</sub>. To synthesize the tungsten oxide nanoparticles the precursor consisted of WCl<sub>6</sub> (≥99.99 %, Sigma–Aldrich) was dissolved in 15 mL of isopropanol to reach a 0.3 M tungsten concentration. The precursor solution was continuously mixed until all of the WCl<sub>6</sub> powder was dissolved, and the solution turned dark blue.

The synthesis was done in a custom-made reaction cell specifically design for performing *in situ* X-ray total scattering experiments. The setup is similar to the one described by Becker et al.<sup>12,13</sup> The precursor suspension was injected into a fused silica tube with 0.7 mm inner diameter and 0.09 mm wall thickness. Throughout the synthesis the pressure was kept constant at 100 bar using an HPLC pump. To apply heat during the reaction a heat gone was placed centered underneath the silica tube. Heat was applied after approximately 30 seconds and kept stable once the reaction reached 310 °C.

The scattering experiment was performed at the P02.1, PETRA III beamline at DESY in Germany, using a wavelength of 0.2072 Å and a sample to detector distance of 210 mm. The detector used is A Perkin Elmer XRD1621 area detector with a pixel size of 0.2×0.2 mm. The sample and detector setup used was the Rapid Acquisition Pair Distribution Function (RA-PDF) setup.<sup>14</sup>

The calibration was done in Fit2D<sup>15</sup> while the azimuthal integration was done with PyFAI<sup>16</sup> and the PDF was calculated using PDFgetX3 with  $Q_{\min} = 0.7 \text{ \AA}^{-1}$  and  $Q_{\max} = 15 \text{ \AA}^{-1}$ ,  $Q_{\text{damp}} = 0.04 \text{ \AA}^{-1}$  and  $r_{\text{poly}} = 0.9 \text{ \AA}$ .<sup>11</sup>

#### D.4. Example 4: $\text{Bi}_2\text{Fe}_4\text{O}_9$

The precursor sample used for the *in situ* heating experiments was synthesized using the sol-gel method. First, 5 mmol  $\text{Bi}(\text{NO}_3)_3 \cdot 5 \text{ H}_2\text{O}$  (reagent grade, 98% Sigma-Aldrich) and 10 mmol  $\text{Fe}(\text{NO}_3)_3 \cdot 9 \text{ H}_2\text{O}$  (reagent grade, 98% Sigma-Aldrich), 11.25 mmol complexing agent (meso-Erythritol,  $\geq 99\%$  Sigma-Aldrich) are dissolved in 27.5 mL deionized water. Heating the solution under stirring to 100 °C leads to a gel, which is subsequently heated at 250 °C for 18 h in an oven to remove residual organics. The resulting solid powdered precursor is then ground and used for the *in situ* total scattering experiments. These were carried out at beamline P21.1 at PETRA III/DESY in Hamburg, Germany using a wavelength of 0.12203 Å, a Perkin-Elmer XRD1621 area detector with a sample detector distance of ca. 500 mm. The powder sample was filled into a quartz capillary with a diameter of 2 mm. The capillary was positioned horizontally, left open at one end, and only half filled to allow for gas exchange. The powder was held in place using quartz wool and heated with a hot air blower from room temperature to 700 °C with a heating rate of 20 K/min and kept for ca. 2 h. Data were integrated using pyFAI<sup>16</sup> and the PDFs obtained using xPDFsuite<sup>12</sup> with a  $Q_{\min} = 0.1 \text{ \AA}^{-1}$ ,  $Q_{\max} = 21.5 \text{ \AA}^{-1}$ ,  $Q_{\text{damp}} = 0.04 \text{ \AA}^{-1}$  and  $r_{\text{poly}} = 0.9$ . The scattering pattern of an empty quartz capillary was used for background subtraction.

#### E: Baseline refinements of experimental PDF's

The baseline fits for the four different experimental PDFs are shown in Fig. S2 and each fits refined parameters are shown in Table S5. The real-space Rietveld refinement of  $\text{CoFe}_2\text{O}_4$ ,  $\text{CeO}_2$ ,  $\text{W}_5\text{O}_{14}$   $\text{Bi}_2\text{Fe}_4\text{O}_9$  are shown in Fig. S2.

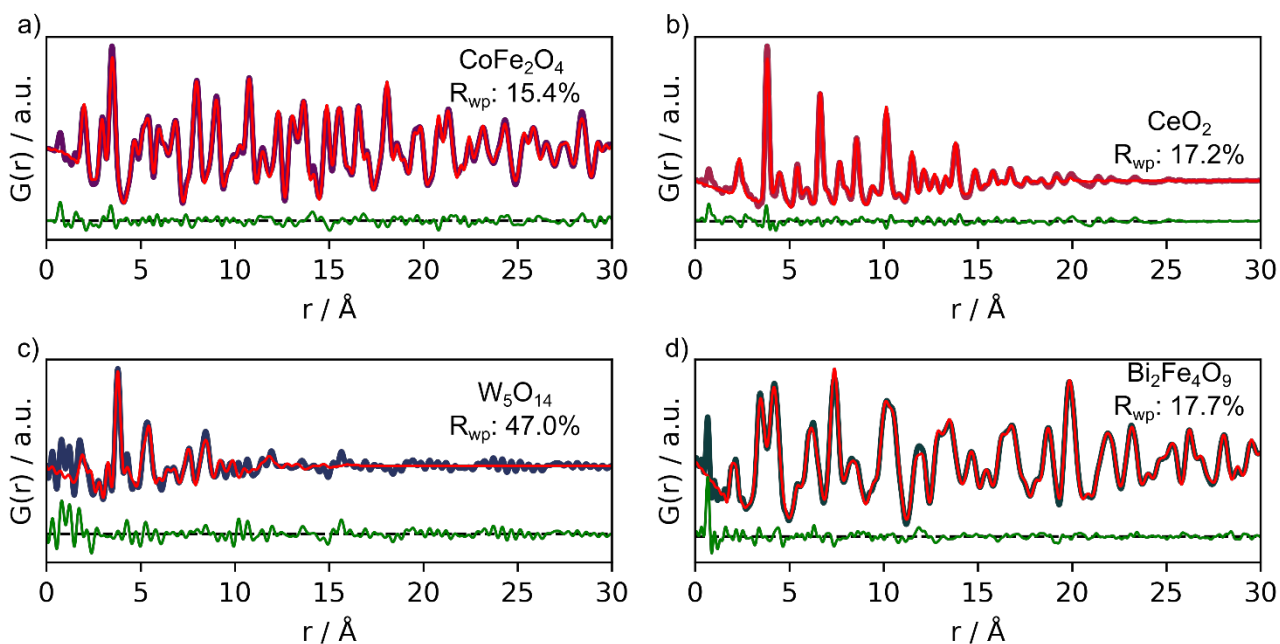

**Figure S2 | Plot of the baseline PDF refinements for the four experimental PDFs.** a) baseline fit of experimental PDF 1: spinel  $\text{CoFe}_2\text{O}_4$  with a  $R_{\text{wp}}$  of 15.4%, b) baseline fit of experimental PDF 2: fluorite  $\text{CeO}_2$  with a  $R_{\text{wp}}$  of 17.2%, c) baseline fit of experimental PDF 3:  $\text{W}_5\text{O}_{14}$  with a  $R_{\text{wp}}$  of 47.0% and d) baseline fit of experimental PDF 4: mullite  $\text{Bi}_2\text{Fe}_4\text{O}_9$  with a  $R_{\text{wp}}$  of 17.7%.



**Table S5 | Fitted baseline parameters of the PDF refinements for the four experimental PDF.** Real-space Rietveld refinements are shown in Fig. S2.

| Structure                                      | $R_{wp}$ [%] | Space group   | Scale | $a$ [Å] | $b$ [Å] | $c$ [Å] | $p_{size}$ [Å] | $\delta_2$ [Å <sup>2</sup> ] | $U_{iso M}$ [Å <sup>2</sup> ] | $U_{iso O}$ [Å <sup>2</sup> ] |
|------------------------------------------------|--------------|---------------|-------|---------|---------|---------|----------------|------------------------------|-------------------------------|-------------------------------|
| CoFe <sub>2</sub> O <sub>4</sub>               | 15.4         | $Fd\bar{3}m$  | 0.59  | 8.4     | -       | -       | 93             | 2.9                          | 0.012                         | 0.027                         |
| CeO <sub>2</sub>                               | 17.2         | $Fd\bar{3}m$  | 0.64  | 5.4     | -       | -       | 23             | 3.4                          | 0.008                         | 0.046                         |
| W <sub>5</sub> O <sub>14</sub>                 | 48.2         | $P\bar{4}21m$ | 0.72  | 23.4    | -       | 3.8     | 19             | 2.7                          | 0.005                         | 0.005                         |
| Bi <sub>2</sub> Fe <sub>4</sub> O <sub>9</sub> | 17.7         | $Pbam$        | 0.19  | 8.0     | 8.5     | 6.0     | 319            | 3.5                          | 0.022                         | 0.066                         |

### E.1. Size estimation of CoFe<sub>2</sub>O<sub>4</sub> and Bi<sub>2</sub>Fe<sub>4</sub>O<sub>9</sub>

To estimate size of the experimental syntheses of CeFe<sub>2</sub>O<sub>4</sub> and Bi<sub>2</sub>Fe<sub>4</sub>O<sub>9</sub> real-space Rietveld refinement from 0 – 60 Å was performed. The fits are shown in Fig. S3 and the fitted parameters in Table S6.

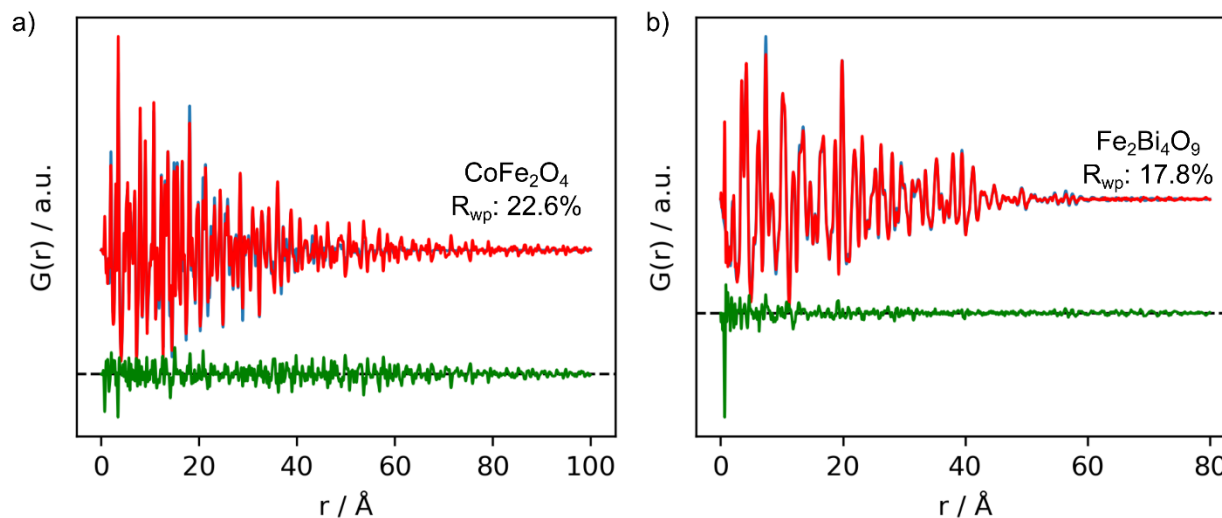

**Figure S3 | Long range real-space Rietveld refinement of Fe<sub>2</sub>Bi<sub>4</sub>O<sub>9</sub> and CoFe<sub>2</sub>O<sub>4</sub>.** a) baseline fit of example 1: spinel CoFe<sub>2</sub>O<sub>4</sub> with a  $R_{wp}$  of 22.6% and b) baseline fit of example 4: mullite Bi<sub>2</sub>Fe<sub>4</sub>O<sub>9</sub> with a  $R_{wp}$  of 17.8%.

**Table S6 | Fitted baseline parameters of the PDF refinements for the four examples.** Real-space Rietveld refinements are shown in Fig. S2.

| Structure                                      | $R_{wp}$ [%] | Scale | $a$ [Å] | $b$ [Å] | $c$ [Å] | $p_{size}$ [Å] | $\delta_2$ [Å <sup>2</sup> ] | $U_{iso M}$ [Å <sup>2</sup> ] | $U_{iso O}$ [Å <sup>2</sup> ] |
|------------------------------------------------|--------------|-------|---------|---------|---------|----------------|------------------------------|-------------------------------|-------------------------------|
| CoFe <sub>2</sub> O <sub>4</sub>               | 22.6         | 0.55  | 8.4     | -       | -       | 174            | 3.3                          | 0.013                         | 0.029                         |
| Bi <sub>2</sub> Fe <sub>4</sub> O <sub>9</sub> | 17.8         | 0.20  | 8.0     | 8.5     | 6.0     | 230            | 3.2                          | 0.022                         | 0.062                         |

## F: Real-space Rietveld refinements of predicted structures

Real-space Rietveld refinement of MLstructureMining's top-5 predictions for each of the four examples.

### F.1.: CoFe<sub>2</sub>O<sub>4</sub> fit parameters

$R_{wp}$  values and fitted parameters for CoFe<sub>2</sub>O<sub>4</sub> are shown in the Table S7 below.

**Table S7 | Fitted structure parameters of top-5 structure predictions on CoFe<sub>2</sub>O<sub>4</sub>.**

| Structure [COD ID] | R <sub>wp</sub> [%] | Scale | a [Å] | c [Å] | p <sub>size</sub> [Å] | δ <sub>2</sub> [Å <sup>2</sup> ] | U <sub>iso M</sub> [Å <sup>2</sup> ] | U <sub>iso O</sub> [Å <sup>2</sup> ] |
|--------------------|---------------------|-------|-------|-------|-----------------------|----------------------------------|--------------------------------------|--------------------------------------|
| 1536758            | 16.9                | 0.58  | 5.9   | 8.4   | 98                    | 2.0                              | 0.011                                | 0.019                                |
| 1537073            | 17.7                | 0.59  | 8.4   | -     | 87                    | 1.8                              | 0.012                                | 0.017                                |
| 1541403            | 17.3                | 0.57  | 8.4   | -     | 89                    | 1.9                              | 0.012                                | 0.015                                |
| 5910031            | 49.7                | 0.28  | 8.4   | -     | 250                   | 5.0                              | 0.009                                | 0.069                                |
| 1539596            | 27.5                | 0.49  | 8.4   | -     | 106                   | 2.1                              | 0.013                                | 0.010                                |

**F.2.: CeO<sub>2</sub> fit parameters**

R<sub>wp</sub> values and fitted parameters for CeO<sub>2</sub> are shown in the Table S8 below.

**Table S8 | Fitted structure parameters of top-5 structure predictions on CeO<sub>2</sub>.**

| Structure [COD ID] | R <sub>wp</sub> [%] | Scale | a [Å] | c [Å] | p <sub>size</sub> [Å] | δ <sub>2</sub> [Å <sup>2</sup> ] | U <sub>iso M</sub> [Å <sup>2</sup> ] | U <sub>iso O</sub> [Å <sup>2</sup> ] |
|--------------------|---------------------|-------|-------|-------|-----------------------|----------------------------------|--------------------------------------|--------------------------------------|
| 1006067            | 16.5                | 0.63  | 3.8   | 19.0  | 24                    | 3.5                              | 0.007                                | 0.044                                |
| 1527617            | 17.3                | 0.76  | 5.5   | 10.7  | 24                    | 3.5                              | 0.007                                | 0.029                                |
| 1527729            | 96.2                | 0.34  | 9.3   | -     | 21                    | 2.2                              | 0.007                                | 3.590                                |
| 2102840            | 17.9                | 0.66  | 3.8   | 5.5   | 24                    | 3.8                              | 0.007                                | 0.055                                |
| 1537009            | 16.1                | 0.61  | 5.4   | -     | 24                    | 3.8                              | 0.008                                | 0.015                                |

**F.3.: W<sub>5</sub>O<sub>14</sub> fit parameters**

R<sub>wp</sub> values and fitted parameters for W<sub>5</sub>O<sub>14</sub> are shown in the Table S9 below.

**Table S9 | Fitted structure parameters of top-5 structure predictions on W<sub>5</sub>O<sub>14</sub>.**

| Structure [COD ID] | R <sub>wp</sub> [%] | Scale | a [Å] | b [Å] | c [Å] | p <sub>size</sub> [Å] | δ <sub>2</sub> [Å <sup>2</sup> ] | U <sub>iso M</sub> [Å <sup>2</sup> ] | U <sub>iso O</sub> [Å <sup>2</sup> ] |
|--------------------|---------------------|-------|-------|-------|-------|-----------------------|----------------------------------|--------------------------------------|--------------------------------------|
| 9014025            | 66.9                | 0.73  | 5.4   | -     | 10.6  | 8                     | 3.0                              | 0.005                                | 16.470                               |
| 7230340            | 67.2                | 0.56  | 24.1  | 5.3   | 5.3   | 12                    | 3.0                              | 0.002                                | 0.000                                |
| 1536855            | 61.6                | 1.23  | 5.4   | 10.4  | 13.5  | 11                    | 4.6                              | 0.005                                | 17.999                               |
| 2311027            | 75.1                | 0.45  | 8.7   | -     | -     | 7                     | 4.7                              | 0.000                                | 0.028                                |
| 9007595            | 56.2                | 0.57  | 5.55  | 11.7  | 5.2   | 12                    | 3.3                              | 0.000                                | 0.005                                |

**F.4.: Bi<sub>2</sub>Fe<sub>4</sub>O<sub>9</sub> fit parameters**

R<sub>wp</sub> value and fitted parameters for Bi<sub>2</sub>Fe<sub>4</sub>O<sub>9</sub> are shown in the Table S10 below.

**Table S10 | Fitted structure parameters of top-5 structure predictions on Bi<sub>2</sub>Fe<sub>4</sub>O<sub>9</sub>.**

| Structure [COD ID] | R <sub>wp</sub> [%] | Scale | a [Å] | b [Å] | c [Å] | p <sub>size</sub> [Å] | δ <sub>2</sub> [Å <sup>2</sup> ] | U <sub>iso M</sub> [Å <sup>2</sup> ] | U <sub>iso O</sub> [Å <sup>2</sup> ] |
|--------------------|---------------------|-------|-------|-------|-------|-----------------------|----------------------------------|--------------------------------------|--------------------------------------|
| 4342599            | 23.6                | 0.19  | 8.0   | 8.5   | 6.0   | 187                   | 3.6                              | 0.020                                | 0.076                                |
| 2104768            | 30.4                | 0.20  | 8.0   | 8.5   | 6.0   | 172                   | 3.3                              | 0.020                                | 0.052                                |
| 2002314            | 22.8                | 0.22  | 8.0   | 8.5   | 6.0   | 186                   | 2.4                              | 0.021                                | 0.084                                |
| 2002219            | 64.9                | 0.25  | 8.3   | -     | 6.0   | 53                    | 3.6                              | 0.048                                | 0.283                                |
| 2106245            | 78.2                | 0.24  | 8.5   | 5.3   | 10.7  | 64                    | 1.0                              | 0.021                                | 0.031                                |

**F.5.: Bi<sub>2</sub>Fe<sub>4</sub>O<sub>9</sub> fit parameters for NMF component 1**

R<sub>wp</sub> value and fitted parameters for Bi<sub>2</sub>Fe<sub>4</sub>O<sub>9</sub> are shown in the Table S11 below.

**Table S11 | Fitted structure parameters of top-5 structure predictions on NMF component 1.**

| Structure [COD ID] | R <sub>wp</sub> [%] | Scale | a [Å] | b [Å] | c [Å] | p <sub>size</sub> [Å] | δ <sub>2</sub> [Å <sup>2</sup> ] | U <sub>iso M</sub> [Å <sup>2</sup> ] | U <sub>iso O</sub> [Å <sup>2</sup> ] |
|--------------------|---------------------|-------|-------|-------|-------|-----------------------|----------------------------------|--------------------------------------|--------------------------------------|
| 4342599            | 26.6                | 0.16  | 8.0   | 8.5   | 6.0   | 187                   | 3.7                              | 0.019                                | 0.117                                |
| 2002219            | 64.2                | 0.20  | 8.3   | -     | 6.0   | 54                    | 3.6                              | 0.044                                | 0.345                                |
| 2104768            | 34.6                | 0.16  | 8.0   | 8.5   | 6.0   | 161                   | 2.8                              | 0.019                                | 0.058                                |
| 9000738            | 55.8                | 0.22  | 8.3   | -     | 18.2  | 65                    | 1.0                              | 0.026                                | 0.086                                |
| 9008148            | 22.8                | 0.17  | 8.0   | 8.5   | 6.0   | 172                   | 2.7                              | 0.020                                | 0.095                                |

**G: PDF in the cloud (PDFitc) benchmark tests**

This section shows the benchmark results produced by PDF in the cloud (PDFitc). Each of the four experimental PDF have been tested and fitted.

**G.1.: CoFe<sub>2</sub>O<sub>4</sub>****Table S12 | PDFitc's settings for the benchmark test on the experimental PDF of CoFe<sub>2</sub>O<sub>4</sub>.** This query resulted in a total of 151 structures and 70 structures had a R<sub>wp</sub> below 50%.

| Scattering type | Composition | Optional parameter                                   | Type of PDF  |
|-----------------|-------------|------------------------------------------------------|--------------|
| X-ray           | Fe-O        | rmin=0<br>rmax=30<br>qmin=1.6<br>qmax=17.5<br>spd=93 | Experimental |

**Table S13 | PDFitc's top-5 structure predictions for CoFe<sub>2</sub>O<sub>4</sub>.**

| Rank | Composition                    | Space group | R <sub>wp</sub> | COD ID  |
|------|--------------------------------|-------------|-----------------|---------|
| 1.   | Fe <sub>3</sub> O <sub>4</sub> | <i>P2/c</i> | 17.1%           | 1532800 |
| 2.   | Fe <sub>3</sub> O <sub>4</sub> | <i>Fd3m</i> | 17.4%           | 1513301 |
| 3.   | Fe <sub>3</sub> O <sub>4</sub> | <i>R3m</i>  | 17.4%           | 1526955 |
| 4.   | Fe <sub>3</sub> O <sub>4</sub> | <i>Fd3m</i> | 17.7%           | 9006199 |
| 5.   | Fe <sub>3</sub> O <sub>4</sub> | <i>Fd3m</i> | 17.8%           | 9016805 |

**Table S14 | Fitted parameters of top-5 structures obtained from the benchmark test for the experimental PDF of CoFe<sub>2</sub>O<sub>4</sub>.**

| Structure [COD ID] | a [Å] | b [Å] | c [Å] | β [°] | p <sub>size</sub> [Å] | U <sub>iso M</sub> [Å <sup>2</sup> ] | U <sub>iso O</sub> [Å <sup>2</sup> ] |
|--------------------|-------|-------|-------|-------|-----------------------|--------------------------------------|--------------------------------------|
| 1532800            | 5.9   | 6.0   | 16.7  | 90.5  | 108                   | 0.009                                | 0.021                                |
| 1513301            | 8.4   | -     | -     | -     | 80                    | 0.011                                | 0.020                                |
| 1526955            | 5.9   | -     | 14.6  | -     | 93                    | 0.010                                | 0.022                                |
| 9006199            | 8.4   | -     | -     | -     | 80                    | 0.011                                | 0.022                                |
| 9016805            | 8.4   | 8.3   | 5.9   | -     | 80                    | 0.011                                | 0.023                                |

### G.2.: CeO<sub>2</sub>

**Table S15 | PDFitc's settings for the benchmark test on the experimental PDF of CeO<sub>2</sub>.** This query resulted in a total of 10 structures and 6 structures had a R<sub>wp</sub> below 50%.

| Scattering type | Composition | Optional parameter                                 | Type of PDF  |
|-----------------|-------------|----------------------------------------------------|--------------|
| X-ray           | Ce-O        | rmin=0<br>rmax=30<br>qmin=0.7<br>qmax=24<br>spd=23 | Experimental |

**Table S16 | PDFitc's top-5 structure predictions for CeO<sub>2</sub>.**

| Rank | Composition                       | Space group                  | R <sub>wp</sub> | COD ID  |
|------|-----------------------------------|------------------------------|-----------------|---------|
| 1.   | Ce <sub>4</sub> O <sub>6.64</sub> | <i>Fd</i> $\bar{3}$ <i>m</i> | 18.1%           | 1521459 |
| 2.   | CeO <sub>2</sub>                  | <i>Fd</i> $\bar{3}$ <i>m</i> | 19.0%           | 4343161 |
| 3.   | CeO <sub>2</sub>                  | <i>Fd</i> $\bar{3}$ <i>m</i> | 19.0%           | 9009008 |
| 4.   | CeO <sub>2</sub>                  | <i>Fd</i> $\bar{3}$ <i>m</i> | 19.0%           | 1562989 |
| 5.   | Ce <sub>11</sub> O <sub>20</sub>  | <i>P</i> $\bar{1}$           | 32.8%           | 1521460 |

**Table S17 | Fitted parameters of top-5 structures obtained from the benchmark test for the experimental PDF of CeO<sub>2</sub>.**

| Structure [COD ID] | <i>a</i> [Å] | <i>b</i> [Å] | <i>c</i> [Å] | $\alpha$ [°] | $\beta$ [°] | $\gamma$ [°] | <i>p</i> <sub>size</sub> [Å] | U <sub>iso M</sub> [Å <sup>2</sup> ] | U <sub>iso O</sub> [Å <sup>2</sup> ] |
|--------------------|--------------|--------------|--------------|--------------|-------------|--------------|------------------------------|--------------------------------------|--------------------------------------|
| 1521459            | 5.4          | -            | -            | -            | -           | -            | 23                           | 0.007                                | 0.032                                |
| 4343161            | 5.4          | -            | -            | -            | -           | -            | 22                           | 0.007                                | 0.032                                |
| 9009008            | 5.4          | -            | -            | -            | -           | -            | 22                           | 0.007                                | 0.032                                |
| 1562989            | 5.4          | -            | -            | -            | -           | -            | 22                           | 0.007                                | 0.032                                |
| 1521460            | 6.7          | 10.3         | 6.6          | 90.6         | 98.7        | 97.7         | 26                           | 0.002                                | 0.048                                |

### G.3.: W<sub>5</sub>O<sub>14</sub>

**Table S18 | PDFitc's settings for the benchmark test on the experimental PDF of W<sub>5</sub>O<sub>14</sub>.** This query resulted in a total of 25 structures and 5 structures had a R<sub>wp</sub> below 50%.

| Scattering type | Composition | Optional parameter                                 | Type of PDF  |
|-----------------|-------------|----------------------------------------------------|--------------|
| X-ray           | W-O         | rmin=0<br>rmax=30<br>qmin=0.7<br>qmax=15<br>spd=19 | Experimental |

**Table S19 | PDFitc's top-5 structure predictions for W<sub>5</sub>O<sub>14</sub>.**

| Rank | Composition                     | Space group                    | R <sub>wp</sub> | COD ID  |
|------|---------------------------------|--------------------------------|-----------------|---------|
| 1.   | W <sub>5</sub> O <sub>14</sub>  | <i>P</i> $\bar{4}$ 21 <i>m</i> | 44.9%           | 1527783 |
| 2.   | W <sub>18</sub> O <sub>49</sub> | <i>P</i> 2/ <i>m</i>           | 45.4%           | 1001678 |
| 3.   | W <sub>18</sub> O <sub>49</sub> | <i>P</i> 2/ <i>m</i>           | 45.4%           | 1528166 |
| 4.   | W <sub>18</sub> O <sub>49</sub> | <i>P</i> 2/ <i>m</i>           | 46.2%           | 1538315 |
| 5.   | W <sub>10</sub> O <sub>29</sub> | <i>P</i> 2/ <i>m</i>           | 48.3%           | 1538317 |

**Table S20 | Fitted parameters of top-5 structures obtained from the benchmark test for the experimental PDF of  $W_5O_{14}$ .**

| Structure [COD ID] | <i>a</i> [Å] | <i>b</i> [Å] | <i>c</i> [Å] | $\beta$ [°] | <i>p</i> <sub>size</sub> [Å] | <i>U</i> <sub>iso M</sub> [Å <sup>2</sup> ] | <i>U</i> <sub>iso O</sub> [Å <sup>2</sup> ] |
|--------------------|--------------|--------------|--------------|-------------|------------------------------|---------------------------------------------|---------------------------------------------|
| 1527783            | 23.5         | -            | 3.8          | -           | 17                           | 0.006                                       | 0.000                                       |
| 1001678            | 18.4         | 3.8          | 14.3         | 118.1       | 20                           | 0.004                                       | 0.030                                       |
| 1528166            | 18.4         | 3.8          | 14.3         | 118.1       | 20                           | 0.004                                       | 0.026                                       |
| 1538315            | 18.4         | 3.8          | 14.3         | 118.3       | 19                           | 0.004                                       | 0.026                                       |
| 1538317            | 12.2         | 3.8          | 22.6         | 94.2        | 16                           | 0.003                                       | 0.036                                       |

#### G.4.: $Bi_2Fe_4O_9$

For the experimental PDF of  $Bi_2Fe_4O_9$  three benchmarks test cases we performed to screen a suitable chemical space.

**Table S21 | PDFitc's settings for the three benchmark tests on the experimental PDF of  $Bi_2Fe_4O_9$ .**

| Case # | Scattering type | Composition         | Optional parameter                                 | Type of PDF  | Total # structures | <i>R</i> <sub>wp</sub> below 50% |
|--------|-----------------|---------------------|----------------------------------------------------|--------------|--------------------|----------------------------------|
| 1      | X-ray           | Fe <sup>*</sup> -O9 | rmin=0<br>rmax=30<br>qmin=0.7<br>qmax=15<br>spd=19 | Experimental | 9                  | 2                                |
| 2      | X-ray           | Fe4 <sup>*</sup> -O |                                                    | Experimental | 22                 | 2                                |
| 3      | X-ray           | <sup>*</sup> -Bi2-O |                                                    | Experimental | 115                | 2                                |

**Table S22 | Case 1: PDFitc's top-5 structure predictions for  $Bi_2Fe_4O_9$ .**

| Rank | Composition                                      | Space group  | <i>R</i> <sub>wp</sub> | COD ID  |
|------|--------------------------------------------------|--------------|------------------------|---------|
| 1.   | Fe <sub>4</sub> Bi <sub>2</sub> O <sub>9</sub>   | <i>Pbam</i>  | 21.6%                  | 1530918 |
| 2.   | Fe <sub>4</sub> Bi <sub>2</sub> O <sub>9</sub>   | <i>Pbam</i>  | 21.9%                  | 9008148 |
| 3.   | Fe <sub>4</sub> P <sub>2</sub> O <sub>9</sub>    | <i>P21/c</i> | 98.2%                  | 1534301 |
| 4.   | Fe <sub>2</sub> (SeO <sub>3</sub> ) <sub>3</sub> | <i>P63/m</i> | 98.7%                  | 1542288 |
| 5.   | Fe(PO <sub>3</sub> ) <sub>3</sub>                | <i>Cc</i>    | 98.9%                  | 1520966 |

**Table S23 | Case 1: Fitted parameters of top-5 structures obtained from the benchmark test for the experimental PDF of  $Bi_2Fe_4O_9$ .**

| Structure [COD ID] | <i>a</i> [Å] | <i>b</i> [Å] | <i>c</i> [Å] | $\beta$ [°] | <i>p</i> <sub>size</sub> [Å] | <i>U</i> <sub>iso Fe</sub> [Å <sup>2</sup> ] | <i>U</i> <sub>iso Bi</sub> [Å <sup>2</sup> ] | <i>U</i> <sub>iso O</sub> [Å <sup>2</sup> ] |
|--------------------|--------------|--------------|--------------|-------------|------------------------------|----------------------------------------------|----------------------------------------------|---------------------------------------------|
| 1530918            | 8.0          | 8.5          | 6.0          | -           | 163                          | 0.018                                        | 0.021                                        | 0.042                                       |
| 9008148            | 8.0          | 8.5          | 6.0          | -           | 153                          | 0.019                                        | 0.020                                        | 0.053                                       |
| 1534301            | 6.7          | 11.2         | 9.5          | 105.6       | -                            | -                                            | -                                            | -                                           |
| 1542288            | 7.3          | -            | 7.4          | -           | -                            | -                                            | -                                            | -                                           |
| 1520966            | 13.4         | 19.0         | 9.6          | 19.0        | -                            | -                                            | -                                            | -                                           |

**Table S24 | Case 2: PDFitc's top-5 structure predictions for  $Bi_2Fe_4O_9$ .**

| Rank | Composition | Space group | <i>R</i> <sub>wp</sub> | COD ID |
|------|-------------|-------------|------------------------|--------|
|------|-------------|-------------|------------------------|--------|

|    |                                                    |             |       |         |
|----|----------------------------------------------------|-------------|-------|---------|
| 1. | Fe <sub>4</sub> Bi <sub>2</sub> O <sub>9</sub>     | <i>Pbam</i> | 21.6% | 1530918 |
| 2. | Fe <sub>4</sub> Bi <sub>2</sub> O <sub>9</sub>     | <i>Pbam</i> | 21.9% | 9008148 |
| 3. | Fe <sub>4</sub> As <sub>2</sub> O <sub>11</sub>    | $P\bar{1}$  | 90.4% | 9009251 |
| 4. | Fe <sub>8</sub> C <sub>11.35</sub> O <sub>16</sub> | <i>C2/m</i> | 95.5% | 9001319 |
| 5. | Fe <sub>4</sub> As <sub>5</sub> O <sub>13</sub>    | $P\bar{1}$  | 95.6% | 9004184 |

**Table S25 | Case 2: Fitted parameters of top-5 structures obtained from the benchmark test for the experimental PDF of Bi<sub>2</sub>Fe<sub>4</sub>O<sub>9</sub>.**

| Structure [COD ID] | <i>a</i> [Å] | <i>b</i> [Å] | <i>c</i> [Å] | $\alpha$ [°] | $\beta$ [°] | $\gamma$ [°] | <i>p</i> <sub>size</sub> [Å] | <i>U</i> <sub>iso Fe</sub> [Å <sup>2</sup> ] | <i>U</i> <sub>iso Bi</sub> [Å <sup>2</sup> ] | <i>U</i> <sub>iso O</sub> [Å <sup>2</sup> ] |
|--------------------|--------------|--------------|--------------|--------------|-------------|--------------|------------------------------|----------------------------------------------|----------------------------------------------|---------------------------------------------|
| 1530918            | 8.0          | 8.5          | 6.0          | -            | -           | -            | 163                          | 0.018                                        | 0.021                                        | 0.042                                       |
| 9008148            | 8.0          | 8.5          | 6.0          | -            | -           | -            | 153                          | 0.019                                        | 0.020                                        | 0.053                                       |
| 9009251            | 6.5          | 6.6          | 5.0          | 105.7        | 98.5        | 110.2        | -                            | -                                            | -                                            | -                                           |
| 9001319            | 10.6         | 3.0          | 10.4         | -            | 91.0        | -            | -                            | -                                            | -                                            | -                                           |
| 9004184            | 9.0          | 10.2         | 9.1          | 60.5         | 111.6       | 80-5         | -                            | -                                            | -                                            | -                                           |

**Table S26 | Case 3: PDFitc's top-5 structure predictions for Bi<sub>2</sub>Fe<sub>4</sub>O<sub>9</sub>.**

| Rank | Composition                                    | Space group | <i>R</i> <sub>wp</sub> | COD ID  |
|------|------------------------------------------------|-------------|------------------------|---------|
| 1.   | Fe <sub>4</sub> Bi <sub>2</sub> O <sub>9</sub> | <i>Pbam</i> | 21.6%                  | 1530918 |
| 2.   | Fe <sub>4</sub> Bi <sub>2</sub> O <sub>9</sub> | <i>Pbam</i> | 21.9%                  | 9008148 |
| 3.   | Ga <sub>4</sub> Bi <sub>2</sub> O <sub>9</sub> | <i>Pbam</i> | 81.1%                  | 1530919 |
| 4.   | Ga <sub>4</sub> Bi <sub>2</sub> O <sub>9</sub> | <i>Pbam</i> | 84.3%                  | 2002314 |
| 5.   | Ga <sub>4</sub> Bi <sub>2</sub> O <sub>9</sub> | <i>Pbam</i> | 84.5%                  | 4342602 |

**Table S27 | Case 3: Fitted parameters of top-5 structures obtained from the benchmark test for the experimental PDF of Bi<sub>2</sub>Fe<sub>4</sub>O<sub>9</sub>.**

| Structure [COD ID] | <i>a</i> [Å] | <i>b</i> [Å] | <i>c</i> [Å] | <i>p</i> <sub>size</sub> [Å] | <i>U</i> <sub>iso Fe</sub> [Å <sup>2</sup> ] | <i>U</i> <sub>iso Bi</sub> [Å <sup>2</sup> ] | <i>U</i> <sub>iso O</sub> [Å <sup>2</sup> ] |
|--------------------|--------------|--------------|--------------|------------------------------|----------------------------------------------|----------------------------------------------|---------------------------------------------|
| 1530918            | 8.0          | 8.5          | 6.0          | 163                          | 0.018                                        | 0.021                                        | 0.042                                       |
| 9008148            | 8.0          | 8.5          | 6.0          | 153                          | 0.019                                        | 0.020                                        | 0.053                                       |
| 1530919            | 8.0          | 8.3          | 6.0          | -                            | -                                            | -                                            | -                                           |
| 2002314            | 8.0          | 8.3          | 5.9          | -                            | -                                            | -                                            | -                                           |
| 4342602            | 8.0          | 8.3          | 5.9          | -                            | -                                            | -                                            | -                                           |

### G.5.: Bi<sub>2</sub>Fe<sub>4</sub>O<sub>9</sub> NMF component

For the experimental PDF of Bi<sub>2</sub>Fe<sub>4</sub>O<sub>9</sub> three benchmarks test cases we performed to screen a suitable chemical space.

**Table S28 | PDFitc's settings for the three benchmark tests on the PDF NMF component of Bi<sub>2</sub>Fe<sub>4</sub>O<sub>9</sub>.**

| Case # | Scattering type | Composition | Optional parameter | Type of PDF  | Total # structures | <i>R</i> <sub>wp</sub> below 50% |
|--------|-----------------|-------------|--------------------|--------------|--------------------|----------------------------------|
| 1      | X-ray           | Fe-*-O9     | rmin=0<br>rmax=30  | Experimental | 9                  | 2                                |
| 2      | X-ray           | Fe4-*-O     | qmin=0.7           | Experimental | 22                 | 2                                |

|   |       |         |                   |              |     |   |
|---|-------|---------|-------------------|--------------|-----|---|
| 3 | X-ray | *-Bi2-O | qmax=15<br>spd=19 | Experimental | 115 | 2 |
|---|-------|---------|-------------------|--------------|-----|---|

**Table S29 | Case 1: PDFitc's top-5 structure predictions for NMF component of Bi<sub>2</sub>Fe<sub>4</sub>O<sub>9</sub>.**

| Rank | Composition                                      | Space group  | R <sub>wp</sub> | COD ID  |
|------|--------------------------------------------------|--------------|-----------------|---------|
| 1.   | Fe <sub>4</sub> Bi <sub>2</sub> O <sub>9</sub>   | <i>Pbam</i>  | 22.5%           | 1530918 |
| 2.   | Fe <sub>4</sub> Bi <sub>2</sub> O <sub>9</sub>   | <i>Pbam</i>  | 23.6%           | 9008148 |
| 3.   | Fe <sub>2</sub> (CO) <sub>9</sub>                | <i>P63/m</i> | 98.7%           | 1010480 |
| 4.   | Fe <sub>2</sub> (SeO <sub>3</sub> ) <sub>3</sub> | <i>P63/m</i> | 98.9%           | 1542288 |
| 5.   | Fe <sub>4</sub> P <sub>2</sub> O <sub>9</sub>    | <i>P21/c</i> | 99.2%           | 1534301 |

**Table S30 | Case 1: Fitted parameters of top-5 structures obtained from the benchmark test for the PDF NMF component of Bi<sub>2</sub>Fe<sub>4</sub>O<sub>9</sub>.**

| Structure [COD ID] | a [Å] | b [Å] | c [Å] | β [°] | p <sub>size</sub> [Å] | U <sub>iso</sub> Fe [Å <sup>2</sup> ] | U <sub>iso</sub> Bi [Å <sup>2</sup> ] | U <sub>iso</sub> O [Å <sup>2</sup> ] |
|--------------------|-------|-------|-------|-------|-----------------------|---------------------------------------|---------------------------------------|--------------------------------------|
| 1530918            | 8.0   | 8.5   | 6.0   | -     | 163                   | 0.019                                 | 0.020                                 | 0.044                                |
| 9008148            | 8.0   | 8.5   | 6.0   | -     | 153                   | 0.020                                 | 0.019                                 | 0.062                                |
| 1010480            | 6.5   | -     | 16.03 | -     | -                     | -                                     | -                                     | -                                    |
| 1542288            | 7.5   | -     | 7.6   | -     | -                     | -                                     | -                                     | -                                    |
| 1534301            | 6.8   | 11.1  | 9.6   | 106.7 | -                     | -                                     | -                                     | -                                    |

**Table S31 | Case 2: PDFitc's top-5 structure predictions for NMF component of Bi<sub>2</sub>Fe<sub>4</sub>O<sub>9</sub>.**

| Rank | Composition                                        | Space group | R <sub>wp</sub> | COD ID  |
|------|----------------------------------------------------|-------------|-----------------|---------|
| 1.   | Fe <sub>4</sub> Bi <sub>2</sub> O <sub>9</sub>     | <i>Pbam</i> | 22.5%           | 1530918 |
| 2.   | Fe <sub>4</sub> Bi <sub>2</sub> O <sub>9</sub>     | <i>Pbam</i> | 23.6%           | 9008148 |
| 3.   | Fe <sub>4</sub> As <sub>2</sub> O <sub>11</sub>    | <i>P1̄</i>  | 89.9%           | 9009251 |
| 4.   | Fe <sub>8</sub> C <sub>11.35</sub> O <sub>16</sub> | <i>C2/m</i> | 96.0%           | 9001319 |
| 5.   | Fe <sub>4</sub> As <sub>5</sub> O <sub>13</sub>    | <i>P1̄</i>  | 97.2%           | 9004184 |

**Table S32 | Case 2: Fitted parameters of top-5 structures obtained from the benchmark test for the PDF NMF component of Bi<sub>2</sub>Fe<sub>4</sub>O<sub>9</sub>.**

| Structure [COD ID] | a [Å] | b [Å] | c [Å] | α [°] | β [°] | γ [°] | p <sub>size</sub> [Å] | U <sub>iso</sub> Fe [Å <sup>2</sup> ] | U <sub>iso</sub> Bi [Å <sup>2</sup> ] | U <sub>iso</sub> O [Å <sup>2</sup> ] |
|--------------------|-------|-------|-------|-------|-------|-------|-----------------------|---------------------------------------|---------------------------------------|--------------------------------------|
| 1530918            | 8.0   | 8.5   | 6.0   | -     | -     | -     | 163                   | 0.019                                 | 0.020                                 | 0.044                                |
| 9008148            | 8.0   | 8.5   | 6.0   | -     | -     | -     | 153                   | 0.020                                 | 0.019                                 | 0.062                                |
| 9009251            | 6.5   | 6.6   | 5.0   | 105.8 | 98.4  | 110.2 | -                     | -                                     | -                                     | -                                    |
| 9001319            | 10.6  | 3.0   | 10.4  | -     | 91.0  | -     | -                     | -                                     | -                                     | -                                    |
| 9004184            | 9.1   | 10.2  | 9.1   | 60.4  | 111.4 | 80.3  | -                     | -                                     | -                                     | -                                    |

**Table S33 | Case 3: PDFitc's top-5 structure predictions for NMF component of Bi<sub>2</sub>Fe<sub>4</sub>O<sub>9</sub>.**

| Rank | Composition                                    | Space group | R <sub>wp</sub> | COD ID  |
|------|------------------------------------------------|-------------|-----------------|---------|
| 1.   | Fe <sub>4</sub> Bi <sub>2</sub> O <sub>9</sub> | <i>Pbam</i> | 22.5%           | 1530918 |
| 2.   | Fe <sub>4</sub> Bi <sub>2</sub> O <sub>9</sub> | <i>Pbam</i> | 23.6%           | 9008148 |
| 3.   | Ga <sub>4</sub> Bi <sub>2</sub> O <sub>9</sub> | <i>Pbam</i> | 81.7%           | 1530919 |
| 4.   | Ga <sub>4</sub> Bi <sub>2</sub> O <sub>9</sub> | <i>Pbam</i> | 85.0%           | 2002314 |
| 5.   | Ga <sub>4</sub> Bi <sub>2</sub> O <sub>9</sub> | <i>Pbam</i> | 85.6%           | 4342602 |

**Table S34 | Case 3: Fitted parameters of top-5 structures obtained from the benchmark test for the PDF NMF component of Bi<sub>2</sub>Fe<sub>4</sub>O<sub>9</sub>.**

| Structure<br>[COD ID] | <i>a</i><br>[Å] | <i>b</i><br>[Å] | <i>c</i><br>[Å] | <i>p</i> <sub>size</sub><br>[Å] | <i>U</i> <sub>iso Fe</sub><br>[Å <sup>2</sup> ] | <i>U</i> <sub>iso Bi</sub><br>[Å <sup>2</sup> ] | <i>U</i> <sub>iso O</sub><br>[Å <sup>2</sup> ] |
|-----------------------|-----------------|-----------------|-----------------|---------------------------------|-------------------------------------------------|-------------------------------------------------|------------------------------------------------|
| 1530918               | 8.0             | 8.5             | 6.0             | 163                             | 0.019                                           | 0.020                                           | 0.044                                          |
| 9008148               | 8.0             | 8.5             | 6.0             | 153                             | 0.020                                           | 0.019                                           | 0.062                                          |
| 1530919               | 8.0             | 8.3             | 6.0             | -                               | -                                               | -                                               | -                                              |
| 2002314               | 8.0             | 8.3             | 5.9             | -                               | -                                               | -                                               | -                                              |
| 4342602               | 8.0             | 8.3             | 5.9             | -                               | -                                               | -                                               | -                                              |

**H: Structure predictions for CeO<sub>2</sub>, W<sub>5</sub>O<sub>14</sub>, Bi<sub>2</sub>Fe<sub>4</sub>O<sub>9</sub> and NMF component 1**

Top-5 of MLstructureMining's structure predictions for the experimental PDFs of CeO<sub>2</sub>, W<sub>5</sub>O<sub>14</sub>, Bi<sub>2</sub>Fe<sub>4</sub>O<sub>9</sub> and NMF component 1.

**Table S35 | Top-5 structure predictions for CeO<sub>2</sub>.**

| Rank | Composition                                                          | Space group          | Probability | R <sub>wp</sub> | COD ID  |
|------|----------------------------------------------------------------------|----------------------|-------------|-----------------|---------|
| 1.   | La <sub>1.2</sub> U <sub>0.8</sub> O <sub>4</sub>                    | <i>R</i> $\bar{3}m$  | 41.7        | 16.5%           | 1006067 |
| 2.   | Cu <sub>3.75</sub> Hg <sub>1.75</sub> S <sub>8</sub> Sn <sub>2</sub> | <i>I</i> $\bar{4}2m$ | 7.2         | 17.3%           | 1527617 |
| 3.   | CdH <sub>6</sub> O <sub>6</sub> Pb                                   | <i>Pn</i> $\bar{3}$  | 3.0         | 96.2%           | 1527729 |
| 4.   | Ce <sub>0.5</sub> O <sub>2</sub> Zr <sub>0.5</sub>                   | <i>P42/nmc</i>       | 0.9         | 17.9%           | 2102840 |
| 5.   | Bi <sub>2</sub> O <sub>3</sub>                                       | <i>Pn</i> $\bar{3}m$ | 0.7         | 16.1%           | 1537009 |

**Table S36 | Top-5 structure predictions for W<sub>5</sub>O<sub>14</sub>.**

| Rank | Composition                                    | Space group          | Probability | R <sub>wp</sub> | COD ID  |
|------|------------------------------------------------|----------------------|-------------|-----------------|---------|
| 1.   | O <sub>4</sub> PbW                             | <i>I41/a</i>         | 1.2         | 66.9%           | 9014025 |
| 2.   | Bi <sub>2</sub> O <sub>9</sub> W <sub>2</sub>  | <i>Pbcn</i>          | 1.1         | 67.2%           | 7230340 |
| 3.   | Fe <sub>3</sub> S <sub>4</sub> Tl <sub>2</sub> | <i>Ibam</i>          | 1.1         | 61.6%           | 1536855 |
| 4.   | H <sub>15</sub> Th <sub>4</sub>                | <i>I</i> $\bar{4}3d$ | 1.1         | 75.1%           | 2311027 |
| 5.   | O <sub>4</sub> SnW                             | <i>Pnna</i>          | 0.8         | 56.2%           | 9007595 |

**Table S37 | Top-5 structure predictions for Bi<sub>2</sub>Fe<sub>4</sub>O<sub>9</sub>.**

| Rank | Composition                                      | Space group | Probability | R <sub>wp</sub> | COD ID  |
|------|--------------------------------------------------|-------------|-------------|-----------------|---------|
| 1.   | AlBi <sub>2</sub> Ga <sub>3</sub> O <sub>9</sub> | <i>Pbam</i> | 32.9        | 23.6%           | 4342599 |
| 2.   | Bi <sub>2</sub> Ga <sub>4</sub> O <sub>9</sub>   | <i>Pbam</i> | 12.2        | 30.4%           | 2104768 |
| 3.   | Bi <sub>2</sub> Ga <sub>4</sub> O <sub>9</sub>   | <i>Pbam</i> | 5.9         | 22.8%           | 2002314 |
| 4.   | Bi <sub>2</sub> O <sub>4</sub> Pd                | <i>I4cm</i> | 2.6         | 64.9%           | 2002219 |
| 5.   | O <sub>8</sub> S <sub>2</sub> Zr                 | <i>Pbam</i> | 2.3         | 78.2%           | 2106245 |

**Table S38 | Top-5 structure predictions for NMF component 1.**

| Rank | Composition                                                                                                 | Space group    | Probability | R <sub>wp</sub> | COD ID  |
|------|-------------------------------------------------------------------------------------------------------------|----------------|-------------|-----------------|---------|
| 1.   | AlBi <sub>2</sub> Ga <sub>3</sub> O <sub>9</sub>                                                            | <i>Pbam</i>    | 16.0        | 26.6%           | 4342599 |
| 2.   | Bi <sub>2</sub> O <sub>4</sub> Pd                                                                           | <i>I4cm</i>    | 15.3        | 64.2%           | 2002219 |
| 3.   | Bi <sub>2</sub> Ga <sub>4</sub> O <sub>9</sub>                                                              | <i>Pbam</i>    | 9.3         | 34.6%           | 2104768 |
| 4.   | As <sub>0.4</sub> Fe <sub>4.56</sub> O <sub>12</sub> S <sub>0.84</sub> Sb <sub>3.84</sub> Zn <sub>0.2</sub> | <i>P42/mbc</i> | 7.2         | 55.8%           | 9000738 |
| 5.   | Bi <sub>2</sub> Fe <sub>4</sub> O <sub>9</sub>                                                              | <i>Pbam</i>    | 5.2         | 22.8%           | 9008148 |



### I: Comparing the PDF of CeO<sub>2</sub> with La<sub>1.2</sub>U<sub>0.8</sub>O<sub>4</sub>

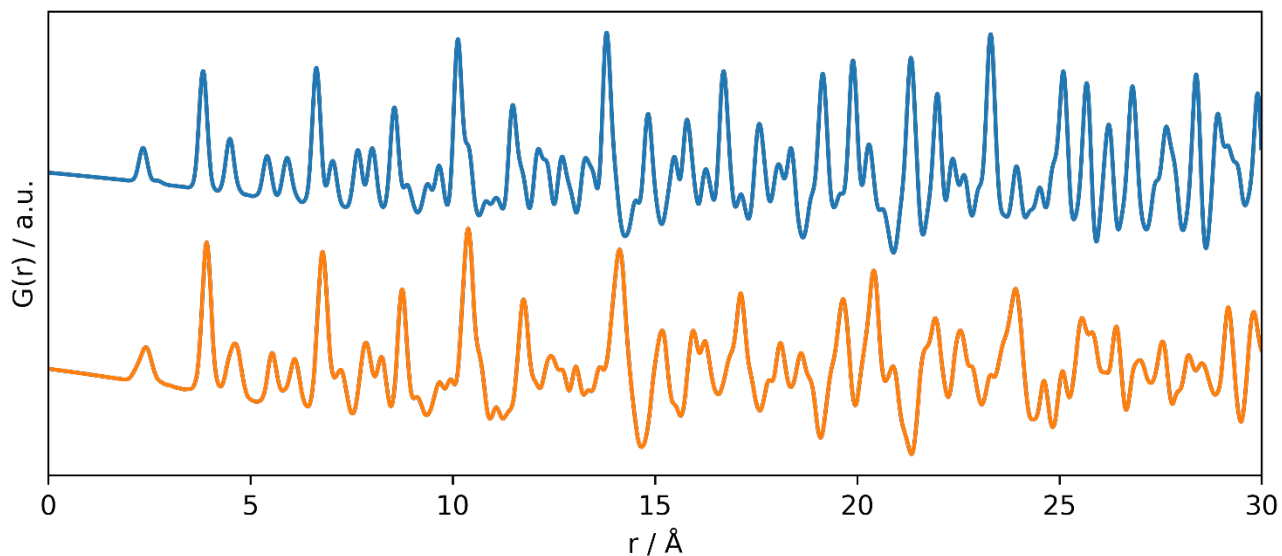

**Figure S4 | Simulated PDFs of CeO<sub>2</sub> and La<sub>1.2</sub>U<sub>0.8</sub>O<sub>4</sub>.** The PDF of CeO<sub>2</sub> (blue) and La<sub>1.2</sub>U<sub>0.8</sub>O<sub>4</sub> (orange) show similar structural peaks. However, the similarity decreases as a function of  $r$ . Due to the difference in electron density, that ration between the metal – metal peaks and the oxygen – oxygen peaks vary.

### J: Real-space Rietveld refinement of Ce constrained structure search for CeO<sub>2</sub>

**Table S39 | Fitted structure parameters of top-5 structure predictions on CoFe<sub>2</sub>O<sub>4</sub>.**

| Structure [COD ID] | Composition                                        | Space group | R <sub>wp</sub> [%] | Scale | $a$ [Å] | $c$ [Å] | $p_{\text{size}}$ [Å] | $\delta_2$ [Å <sup>2</sup> ] | $U_{\text{iso M}}$ [Å <sup>2</sup> ] | $U_{\text{iso O}}$ [Å <sup>2</sup> ] |
|--------------------|----------------------------------------------------|-------------|---------------------|-------|---------|---------|-----------------------|------------------------------|--------------------------------------|--------------------------------------|
| 2102840            | Ce <sub>0.5</sub> Zr <sub>0.5</sub> O <sub>2</sub> | $P42/nmc$   | 17.9                | 0.66  | 3.8     | 5.5     | 24                    | 3.8                          | 0.007                                | 0.055                                |
| 2102840            | CeO <sub>2</sub>                                   | $P42/nmc$   | 16.1                | 0.61  | 3.9     | 5.4     | 24                    | 3.8                          | 0.007                                | 0.034                                |

**K: Top-3 structure prediction for every frame in the  $\text{Bi}_2\text{Fe}_4\text{O}_9$  *in situ* experiment**

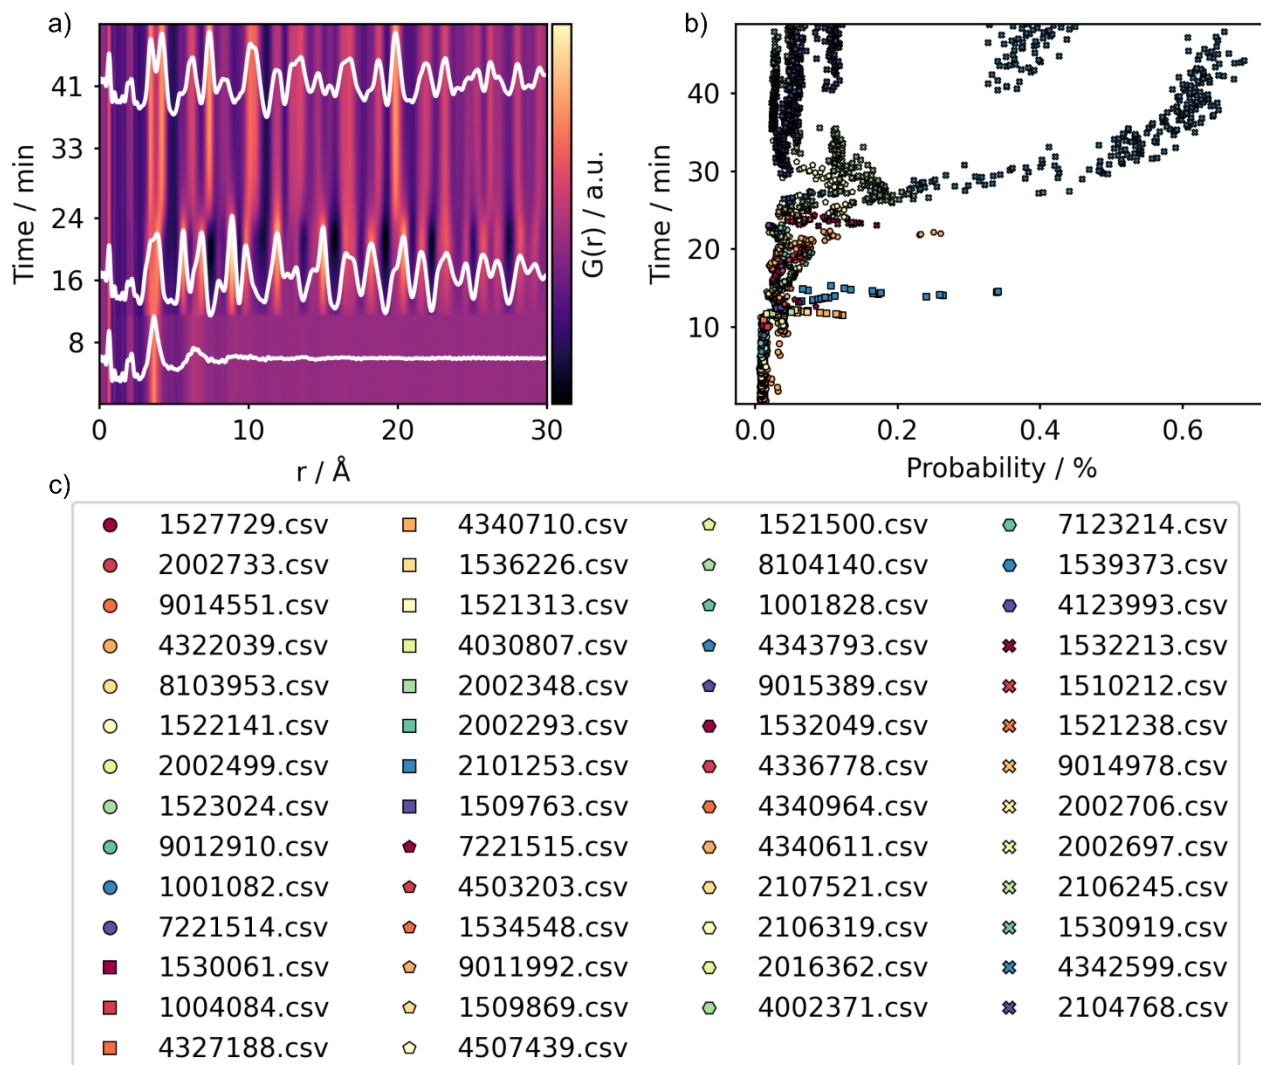

**Figure S5 | *In situ* experiment of example 4,  $\text{Bi}_2\text{Fe}_4\text{O}_9$ , with frame wise top-3 prediction from MLstructureMining.** a) *in situ* experiment from the formation of  $\text{Bi}_2\text{Fe}_4\text{O}_9$ . The three distinct phases (precursor, intermediate and product) are highlighted in white. b) The time plotted as function of the probability output for the top-3 predictions. c) all legends for plot b) with the COD identification codes.

**L: Structure analysis of the  $\text{BiFeO}_3$  intermediate and NMF component 2**

This section shows the results of the structure analysis of the intermediate phase ( $\text{BiFeO}_3$ ) and the reconstructed NMF component obtained from the *in situ* series of  $\text{Bi}_2\text{Fe}_4\text{O}_9$ .

### L.1.: Baseline refinement of BiFeO<sub>3</sub> and NMF component 2

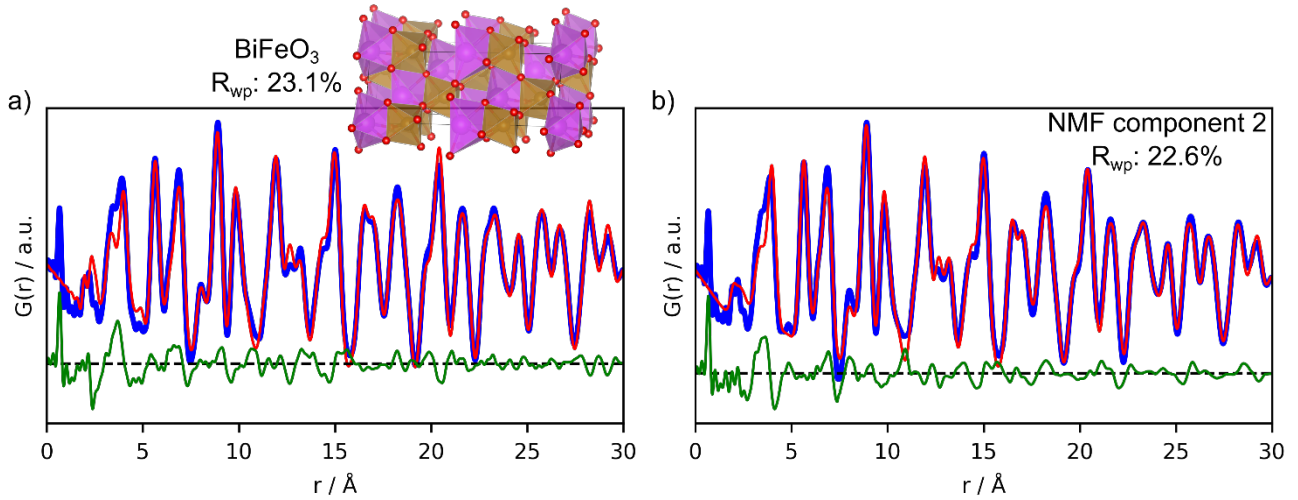

**Figure S6 | Plots of the baseline PDF refinements for the BiFeO<sub>3</sub> and NMF component 2.** a) baseline fit of intermediate phase if the *in situ* series of Bi<sub>2</sub>Fe<sub>4</sub>O<sub>9</sub>: BiFeO<sub>3</sub> with a  $R_{wp}$  of 23.1%, and b) baseline fit NMF components 2: BiFeO<sub>3</sub> with a  $R_{wp}$  of 22.6%. The structures used for both fits are shown above a).

### L.2.: Structure predictions for BiFeO<sub>3</sub> and NMF component 2

**Table S40 | Top-5 structure predictions for BiFeO<sub>3</sub>.**

| Rank | Composition                                            | Space group    | Probability | $R_{wp}$ | COD ID  |
|------|--------------------------------------------------------|----------------|-------------|----------|---------|
| 1.   | BiFeO <sub>3</sub>                                     | <i>R3c</i>     | 7.9         | 18.3%    | 4336778 |
| 2.   | BiMnO <sub>3</sub>                                     | <i>C12/c1</i>  | 3.4         | 34.5%    | 4340611 |
| 3.   | Ca <sub>2.667</sub> Nb <sub>1.333</sub> O <sub>6</sub> | <i>P121/c1</i> | 3.2         | 38.8%    | 1521500 |
| 4.   | O <sub>3</sub> PbTi                                    | <i>P4mm</i>    | 3.2         | 28.0%    | 2107521 |
| 5.   | O <sub>3</sub> PbTi <sub>0.1</sub> Zr <sub>0.9</sub>   | <i>R3c</i>     | 1.6         | 30.0%    | 2106319 |

**Table S41 | Top-5 structure predictions for NMF component 2.**

| Rank | Composition                                            | Space group    | Probability | $R_{wp}$ | COD ID  |
|------|--------------------------------------------------------|----------------|-------------|----------|---------|
| 1.   | Co <sub>0.5</sub> NdO <sub>3</sub> Pt <sub>0.5</sub>   | <i>P121/n1</i> | 8.9         | 41.3%    | 9015792 |
| 2.   | BiMnO <sub>3</sub>                                     | <i>C12/c1</i>  | 3.9         | 34.2%    | 4340611 |
| 3.   | BiFeO <sub>3</sub>                                     | <i>R3c</i>     | 3.2         | 21.1%    | 4336778 |
| 4.   | Ca <sub>2.667</sub> Nb <sub>1.333</sub> O <sub>6</sub> | <i>P121/c1</i> | 2.6         | 41.5%    | 1521500 |
| 5.   | O <sub>3</sub> PbTi                                    | <i>P4mm</i>    | 2.3         | 29.9%    | 2107521 |

### L.3.: Real-space Rietveld refinements of predicted structures for BiFeO<sub>3</sub> and NMF component 2

**Table S42 | Fitted structure parameters of top-5 structure predictions on BiFeO<sub>3</sub>.**

| Structure [COD ID] | $R_{wp}$ [%] | Scale | <i>a</i> [Å] | <i>b</i> [Å] | <i>c</i> [Å] | $\beta$ [°] | <i>p</i> <sub>size</sub> [Å] | $\delta_2$ [Å <sup>2</sup> ] | $U_{iso M}$ [Å <sup>2</sup> ] | $U_{iso O}$ [Å <sup>2</sup> ] |
|--------------------|--------------|-------|--------------|--------------|--------------|-------------|------------------------------|------------------------------|-------------------------------|-------------------------------|
| 4336778            | 18.3         | 0.15  | 5.6          | -            | 14.0         | -           | 144                          | 3.5                          | 0.026                         | 0.032                         |
| 4340611            | 34.5         | 0.14  | 9.8          | 5.6          | 9.9          | 108.9       | 300                          | 4.0                          | 0.023                         | 0.024                         |
| 1521500            | 38.8         | 0.20  | 5.6          | 5.7          | 9.7          | 126.1       | 300                          | 1.0                          | 0.022                         | 0.022                         |
| 2107521            | 28.0         | 0.15  | 4.0          | -            | 4.0          | -           | 167                          | 3.9                          | 0.31                          | 0.428                         |

|         |      |      |     |   |      |   |     |     |       |       |
|---------|------|------|-----|---|------|---|-----|-----|-------|-------|
| 2106319 | 30.0 | 0.14 | 5.6 | - | 13.9 | - | 236 | 3.7 | 0.027 | 0.337 |
|---------|------|------|-----|---|------|---|-----|-----|-------|-------|

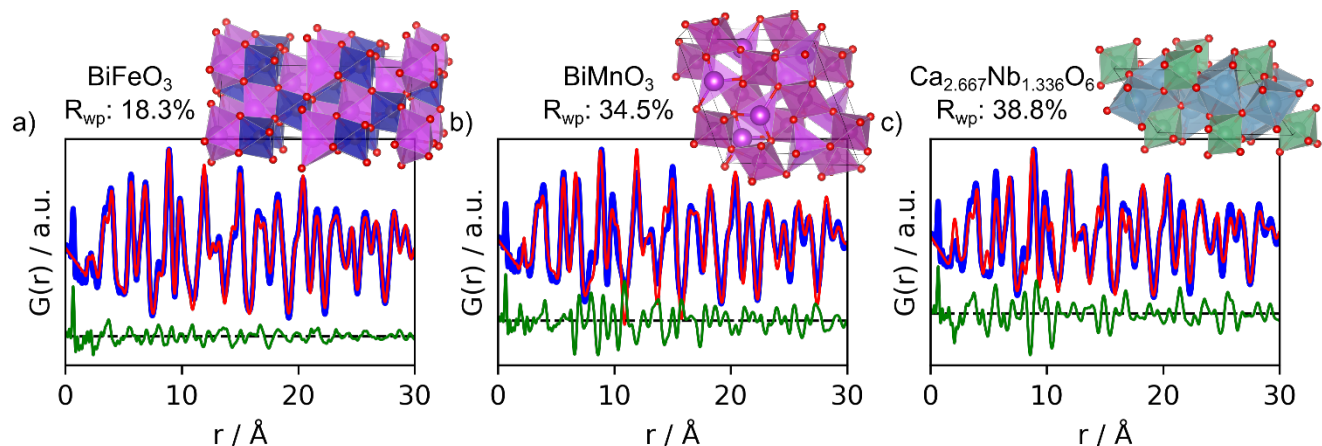

**Figure S7 | Top-3 real-space Rietveld refinement of the intermediate, BiFeO<sub>3</sub>, phase of the *in situ* series of Bi<sub>2</sub>Fe<sub>4</sub>O<sub>9</sub>.** a) BiFeO<sub>3</sub> with an R<sub>wp</sub> of 18.3%, b) BiMnO<sub>3</sub> with an R<sub>wp</sub> of 34.5% and c) Ca<sub>2.667</sub>Nb<sub>1.336</sub>O<sub>6</sub> with an R<sub>wp</sub> of 38.8%, fit parameters can be seen in Table S41. The structure used for each fit is shown above the fit.

**Table S43 | Fitted structure parameters of top-5 structure predictions on NMF component 2.**

| Structure [COD ID] | R <sub>wp</sub> [%] | Scale | a [Å] | b [Å] | c [Å] | β [°] | γ [°] | p <sub>size</sub> [Å] | δ <sub>2</sub> [Å <sup>2</sup> ] | U <sub>iso M</sub> [Å <sup>2</sup> ] | U <sub>iso O</sub> [Å <sup>2</sup> ] |
|--------------------|---------------------|-------|-------|-------|-------|-------|-------|-----------------------|----------------------------------|--------------------------------------|--------------------------------------|
| 9015792            | 41.3                | 0.10  | 5.6   | 5.7   | 8.0   | -     | 91.7  | 120                   | 3.1                              | 0.021                                | 0.059                                |
| 4340611            | 34.2                | 0.09  | 9.8   | 5.6   | 9.8   | 108.9 | -     | 135                   | 4.6                              | 0.025                                | 0.391                                |
| 4336778            | 21.1                | 0.09  | 5.6   | -     | 14.0  | -     | -     | 107                   | 3.5                              | 0.026                                | 0.052                                |
| 1521500            | 41.5                | 0.12  | 5.6   | 5.7   | 9.7   | 126.1 | -     | 300                   | 1.0                              | 0.021                                | 0.021                                |
| 2107521            | 29.9                | 0.09  | 4.0   | -     | 4.0   | -     | -     | 115                   | 3.9                              | 0.31                                 | 0.598                                |

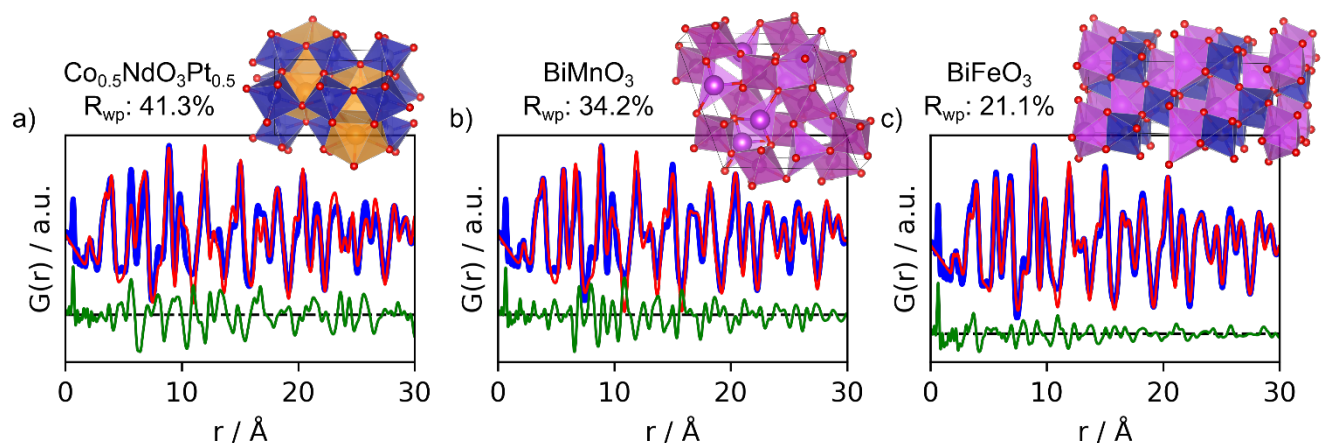

**Figure S8 | Top-3 real-space Rietveld refinement of NMF component 2 of the *in situ* series of Bi<sub>2</sub>Fe<sub>4</sub>O<sub>9</sub>.** a) Co<sub>0.5</sub>NdO<sub>3</sub>Pt<sub>0.5</sub> with an R<sub>wp</sub> of 41.3%, b) BiMnO<sub>3</sub> with an R<sub>wp</sub> of 34.2% and c) BiFeO<sub>3</sub> with an R<sub>wp</sub> of 21.1%, fit parameters can be seen in Table S42. The structure used for each fit is shown above the fit.

#### L.4.: PDFitc benchmark tests for BiFeO<sub>3</sub> and NMF component of BiFeO<sub>3</sub>

For the experimental PDF of Bi<sub>2</sub>Fe<sub>4</sub>O<sub>9</sub> two benchmarks test cases we performed to screen a suitable chemical space.

**Table S44 | PDFitc's settings for the three benchmark tests on the experimental PDF of Bi<sub>2</sub>Fe<sub>4</sub>O<sub>9</sub>.**

| Case # | Scattering type | Composition         | Optional parameter                                    | Type of PDF  | Total # structures | R <sub>wp</sub> below 50% |
|--------|-----------------|---------------------|-------------------------------------------------------|--------------|--------------------|---------------------------|
| 1      | X-ray           | Fe <sup>*</sup> -O3 | rmin=0<br>rmax=30<br>qmin=0.1<br>qmax=21.5<br>spd=300 | Experimental | 202                | 6                         |
| 2      | X-ray           | Bi <sup>*</sup> -O3 |                                                       | Experimental | 62                 | 6                         |

**Table S45 | Case 1: PDFitc's top-5 structure predictions for BiFeO<sub>3</sub>.**

| Rank | Composition        | Space group | R <sub>wp</sub> | COD ID  |
|------|--------------------|-------------|-----------------|---------|
| 1.   | FeBiO <sub>3</sub> | <i>P1</i>   | 17.7%           | 4333972 |
| 2.   | FeBiO <sub>3</sub> | <i>R3c</i>  | 18.0%           | 4336776 |
| 3.   | FeBiO <sub>3</sub> | <i>R3c</i>  | 18.1%           | 4336775 |
| 4.   | FeBiO <sub>3</sub> | <i>R3c</i>  | 18.1%           | 7233675 |
| 5.   | FeBiO <sub>3</sub> | <i>R3c</i>  | 18.3%           | 4501315 |

**Table S46 | Case 1: Fitted parameters of top-5 structures obtained from the benchmark test for the experimental PDF of BiFeO<sub>3</sub>.**

| Structure [COD ID] | <i>a</i> [Å] | <i>b</i> [Å] | <i>c</i> [Å] | $\alpha$ [°] | $\beta$ [°] | $\gamma$ [°] | <i>p</i> <sub>size</sub> [Å] | U <sub>iso</sub> Fe [Å <sup>2</sup> ] | U <sub>iso</sub> Bi [Å <sup>2</sup> ] | U <sub>iso</sub> O [Å <sup>2</sup> ] |
|--------------------|--------------|--------------|--------------|--------------|-------------|--------------|------------------------------|---------------------------------------|---------------------------------------|--------------------------------------|
| 4333972            | 5.7          | 5.7          | 5.6          | 60.1         | 59.5        | 59.6         | 154                          | 0.011                                 | 0.026                                 | 0.032                                |
| 4336776            | 5.6          | -            | 13.9         | -            | -           | -            | 118                          | 0.013                                 | 0.027                                 | 0.030                                |
| 4336775            | 5.6          | -            | 13.9         | -            | -           | -            | 118                          | 0.027                                 | 0.013                                 | 0.031                                |
| 7233675            | 5.6          | -            | 13.9         | -            | -           | -            | 115                          | 0.014                                 | 0.027                                 | 0.031                                |
| 4501315            | 5.6          | -            | 13.9         | -            | -           | -            | 115                          | 0.012                                 | 0.027                                 | 0.034                                |

**Table S47 | Case 2: PDFitc's top-5 structure predictions for BiFeO<sub>3</sub>.**

| Rank | Composition        | Space group | R <sub>wp</sub> | COD ID  |
|------|--------------------|-------------|-----------------|---------|
| 1.   | FeBiO <sub>3</sub> | <i>P1</i>   | 17.7%           | 4333972 |
| 2.   | FeBiO <sub>3</sub> | <i>R3c</i>  | 18.0%           | 4336776 |
| 3.   | FeBiO <sub>3</sub> | <i>R3c</i>  | 18.1%           | 4336775 |
| 4.   | FeBiO <sub>3</sub> | <i>R3c</i>  | 18.1%           | 7233675 |
| 5.   | FeBiO <sub>3</sub> | <i>R3c</i>  | 18.3%           | 4501315 |

**Table S48 | Case 2: Fitted parameters of top-5 structures obtained from the benchmark test for the experimental PDF of BiFeO<sub>3</sub>.**

| Structure [COD ID] | <i>a</i> [Å] | <i>b</i> [Å] | <i>c</i> [Å] | $\alpha$ [°] | $\beta$ [°] | $\gamma$ [°] | <i>p</i> <sub>size</sub> [Å] | U <sub>iso</sub> Fe [Å <sup>2</sup> ] | U <sub>iso</sub> Bi [Å <sup>2</sup> ] | U <sub>iso</sub> O [Å <sup>2</sup> ] |
|--------------------|--------------|--------------|--------------|--------------|-------------|--------------|------------------------------|---------------------------------------|---------------------------------------|--------------------------------------|
| 4333972            | 5.7          | 5.7          | 5.6          | 60.1         | 59.5        | 59.6         | 154                          | 0.011                                 | 0.026                                 | 0.032                                |
| 4336776            | 5.6          | -            | 13.9         | -            | -           | -            | 118                          | 0.013                                 | 0.027                                 | 0.030                                |

|         |     |   |      |   |   |   |     |       |       |       |
|---------|-----|---|------|---|---|---|-----|-------|-------|-------|
| 4336775 | 5.6 | - | 13.9 | - | - | - | 118 | 0.027 | 0.013 | 0.031 |
| 7233675 | 5.6 | - | 13.9 | - | - | - | 115 | 0.014 | 0.027 | 0.031 |
| 4501315 | 5.6 | - | 13.9 | - | - | - | 115 | 0.012 | 0.027 | 0.034 |

**Table S49 | PDFitc's settings for the three benchmark tests on NMF component 2.**

| Case # | Scattering type | Composition         | Optional parameter                                    | Type of PDF  | Total # structures | R <sub>wp</sub> below 50% |
|--------|-----------------|---------------------|-------------------------------------------------------|--------------|--------------------|---------------------------|
| 1      | X-ray           | Fe <sup>*</sup> -O3 | rmin=0<br>rmax=30<br>qmin=0.1<br>qmax=21.5<br>spd=104 | Experimental | 202                | 6                         |
| 2      | X-ray           | Bi <sup>*</sup> -O3 |                                                       | Experimental | 62                 | 6                         |

**Table S50 | Case 1: PDFitc's top-5 structure predictions for NMF component 2.**

| Rank | Composition        | Space group | R <sub>wp</sub> | COD ID  |
|------|--------------------|-------------|-----------------|---------|
| 1.   | FeBiO <sub>3</sub> | <i>P1</i>   | 20.1%           | 4333972 |
| 2.   | FeBiO <sub>3</sub> | <i>R3c</i>  | 21.2%           | 4336776 |
| 3.   | FeBiO <sub>3</sub> | <i>R3c</i>  | 21.2%           | 4336775 |
| 4.   | FeBiO <sub>3</sub> | <i>R3c</i>  | 21.2%           | 7233675 |
| 5.   | FeBiO <sub>3</sub> | <i>R3c</i>  | 21.4%           | 4501315 |

**Table S51 | Case 1: Fitted parameters of top-5 structures obtained from the benchmark test for the experimental PDF of NMF component 2.**

| Structure [COD ID] | <i>a</i> [Å] | <i>b</i> [Å] | <i>c</i> [Å] | $\alpha$ [°] | $\beta$ [°] | $\gamma$ [°] | <i>p</i> <sub>size</sub> [Å] | U <sub>iso</sub> Fe [Å <sup>2</sup> ] | U <sub>iso</sub> Bi [Å <sup>2</sup> ] | U <sub>iso</sub> O [Å <sup>2</sup> ] |
|--------------------|--------------|--------------|--------------|--------------|-------------|--------------|------------------------------|---------------------------------------|---------------------------------------|--------------------------------------|
| 4333972            | 5.7          | 5.7          | 5.6          | 60.0         | 60.0        | 59.8         | 105                          | 0.012                                 | 0.026                                 | 0.040                                |
| 4336776            | 5.6          | -            | 13.9         | -            | -           | -            | 93                           | 0.013                                 | 0.026                                 | 0.043                                |
| 4336775            | 5.6          | -            | 13.9         | -            | -           | -            | 104                          | 0.014                                 | 0.026                                 | 0.044                                |
| 7233675            | 5.6          | -            | 13.9         | -            | -           | -            | 94                           | 0.015                                 | 0.026                                 | 0.045                                |
| 4501315            | 5.6          | -            | 13.9         | -            | -           | -            | 104                          | 0.013                                 | 0.026                                 | 0.054                                |

**Table S52 | Case 2: PDFitc's top-5 structure predictions for NMF component 2.**

| Rank | Composition        | Space group | R <sub>wp</sub> | COD ID  |
|------|--------------------|-------------|-----------------|---------|
| 1.   | FeBiO <sub>3</sub> | <i>P1</i>   | 20.1%           | 4333972 |
| 2.   | FeBiO <sub>3</sub> | <i>R3c</i>  | 21.2%           | 4336776 |
| 3.   | FeBiO <sub>3</sub> | <i>R3c</i>  | 21.2%           | 4336775 |
| 4.   | FeBiO <sub>3</sub> | <i>R3c</i>  | 21.2%           | 7233675 |
| 5.   | FeBiO <sub>3</sub> | <i>R3c</i>  | 21.4%           | 4501315 |

**Table S53 | Case 2: Fitted parameters of top-5 structures obtained from the benchmark test for the experimental PDF of NMF component 2.**

| Structure [COD ID] | <i>a</i> [Å] | <i>b</i> [Å] | <i>c</i> [Å] | $\alpha$ [°] | $\beta$ [°] | $\gamma$ [°] | <i>p</i> <sub>size</sub> [Å] | U <sub>iso</sub> Fe [Å <sup>2</sup> ] | U <sub>iso</sub> Bi [Å <sup>2</sup> ] | U <sub>iso</sub> O [Å <sup>2</sup> ] |
|--------------------|--------------|--------------|--------------|--------------|-------------|--------------|------------------------------|---------------------------------------|---------------------------------------|--------------------------------------|
| 4333972            | 5.7          | 5.7          | 5.6          | 60.0         | 60.0        | 59.8         | 105                          | 0.012                                 | 0.026                                 | 0.040                                |
| 4336776            | 5.6          | -            | 13.9         | -            | -           | -            | 93                           | 0.013                                 | 0.026                                 | 0.043                                |

|         |     |   |      |   |   |   |     |       |       |       |
|---------|-----|---|------|---|---|---|-----|-------|-------|-------|
| 4336775 | 5.6 | - | 13.9 | - | - | - | 104 | 0.014 | 0.026 | 0.044 |
| 7233675 | 5.6 | - | 13.9 | - | - | - | 94  | 0.015 | 0.026 | 0.045 |
| 4501315 | 5.6 | - | 13.9 | - | - | - | 104 | 0.013 | 0.026 | 0.054 |

**M: Principal component analysis and non-negative matrix factorization on *in situ* Bi<sub>2</sub>Fe<sub>4</sub>O<sub>9</sub> with precursor**

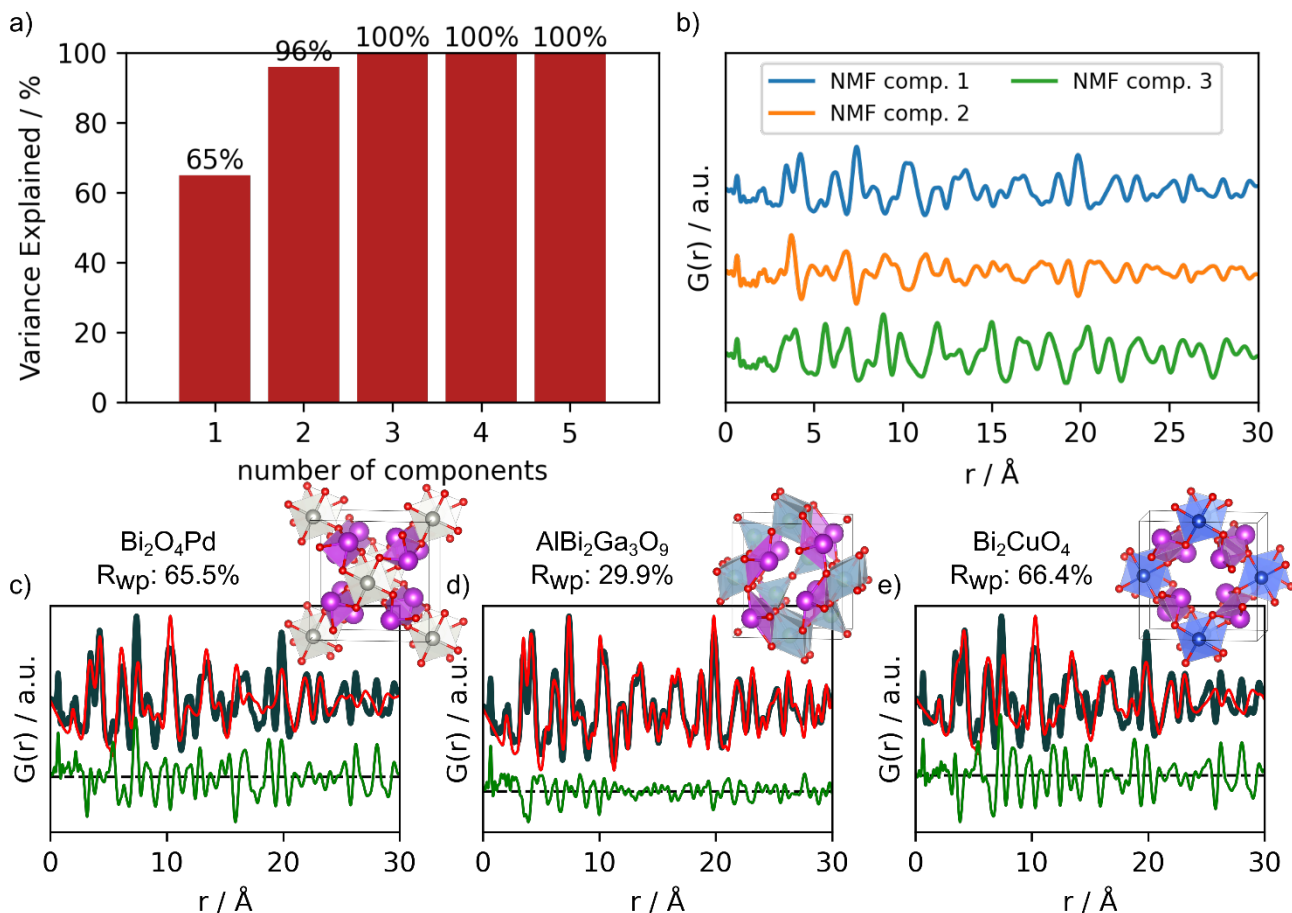

**Figure S9 | Three component PCA and NMF structure characterization the *in situ* series of Bi<sub>2</sub>Fe<sub>4</sub>O<sub>9</sub>.** a) The cumulative variance explained by the PCA components and b) show the reconstructed NMF components. The real-space Rietveld refinements of top-3 predictions are shown in c), d) and e), fit parameters can be seen in Table S54. The fits are performed on NMF component 1.

**Table S54 | Top-5 structure predictions for NMF component 1 with precursor.**

| Rank | Composition                                                                                                 | Space group    | Probability | R <sub>wp</sub> | COD ID  |
|------|-------------------------------------------------------------------------------------------------------------|----------------|-------------|-----------------|---------|
| 1.   | Bi <sub>2</sub> O <sub>4</sub> Pd                                                                           | <i>I4cm</i>    | 23.7%       | 65.5%           | 2002219 |
| 2.   | AlBi <sub>2</sub> Ga <sub>3</sub> O <sub>9</sub>                                                            | <i>Pbam</i>    | 11.7%       | 29.9%           | 4342599 |
| 3.   | Bi <sub>2</sub> CuO <sub>4</sub>                                                                            | <i>P4/ncc</i>  | 6.9%        | 66.4%           | 1004051 |
| 4.   | As <sub>0.4</sub> Fe <sub>4.56</sub> O <sub>12</sub> S <sub>0.84</sub> Sb <sub>3.84</sub> Zn <sub>0.2</sub> | <i>P42/mbc</i> | 4.6%        | 57.6%           | 9000738 |
| 5.   | Bi <sub>2</sub> Fe <sub>4</sub> O <sub>9</sub>                                                              | <i>Pbam</i>    | 3.6%        | 24.2%           | 1530918 |

**Table S55 | Fitted structure parameters of top-5 structure predictions on NMF component 1 with precursor.**

| <b>Structure<br/>[COD ID]</b> | <b>R<sub>wp</sub><br/>[%]</b> | <b>Scale</b> | <b>a<br/>[Å]</b> | <b>b<br/>[Å]</b> | <b>c<br/>[Å]</b> | <b>p<sub>size</sub><br/>[Å]</b> | <b>δ<sub>2</sub><br/>[Å<sup>2</sup>]</b> | <b>U<sub>iso M</sub><br/>[Å<sup>2</sup>]</b> | <b>U<sub>iso O</sub><br/>[Å<sup>2</sup>]</b> |
|-------------------------------|-------------------------------|--------------|------------------|------------------|------------------|---------------------------------|------------------------------------------|----------------------------------------------|----------------------------------------------|
| 2002219                       | 65.5                          | 0.18         | 8.3              | -                | 6.0              | 58                              | 3.6                                      | 0.040                                        | 0.512                                        |
| 4342599                       | 29.9                          | 0.15         | 8.0              | 8.5              | 6.0              | 288                             | 3.7                                      | 0.019                                        | 0.164                                        |
| 1004051                       | 66.4                          | 0.15         | 8.3              | -                | 6.1              | 66                              | 4.2                                      | 0.036                                        | 4.882                                        |
| 9000738                       | 57.6                          | 0.20         | 8.3              | -                | 18.2             | 71                              | 1.0                                      | 0.024                                        | 0.092                                        |
| 1530918                       | 24.2                          | 0.16         | 8.0              | 8.5              | 6.0              | 243                             | 2.6                                      | 0.020                                        | 0.062                                        |



## References

- 1 Bouhlef, M. A., Hwang, J., Bartoli, N., Lafage, R., Morlier, J. & Martins, J. A Python surrogate modeling framework with derivatives. *Adv. Eng. Softw.* (2019). <https://doi.org/10.1016/j.advengsoft.2019.03.005>
- 2 Bishop, C. M. & Nasrabadi, N. M. *Pattern recognition and machine learning*. Vol. 4 (Springer, 2006).
- 3 Juhás, P., Farrow, Christopher L., Yang, X., Knox, Kevin R. & Billinge, Simon J. L. Complex modeling: a strategy and software program for combining multiple information sources to solve ill posed structure and nanostructure inverse problems. *Acta Cryst. A* **71**, 562-568 (2015). <https://doi.org/10.1107/S2053273315014473>
- 4 Nogueira, F. Bayesian Optimization: Open source constrained global optimization tool for Python. *GitHub*, <https://github.com/fmfn/BayesianOptimization> (2014).
- 5 Chen, T. & Guestrin, C. in *Proceedings of the 22nd acm sigkdd international conference on knowledge discovery and data mining*. 785-794.
- 6 Nicolae, M.-I. *et al.* Adversarial Robustness Toolbox v1. 0.0. *arXiv preprint arXiv:1807.01069* (2018).
- 7 Myers, J., Well, A. & Lorch Jr, R. *Research design and statistical analysis* Routledge. Vol. 3 (Routledge, 2010).
- 8 Sapnik, A. F. *et al.* Multivariate analysis of disorder in metal–organic frameworks. *Nat. Commun.* **13**, 2173 (2022). <https://doi.org/10.1038/s41467-022-29849-6>
- 9 Mukaddem, K. T., Chater, P. A., Devereux, L. R., Al Bahri, O. K., Jain, A. & Cole, J. M. Dye-Anchoring Modes at the Dye–TiO<sub>2</sub> Interface of N3- and N749-Sensitized Solar Cells Revealed by Glancing-Angle Pair Distribution Function Analysis. *J. Phys. Chem. C* **124**, 11935-11945 (2020). <https://doi.org/10.1021/acs.jpcc.0c02314>
- 10 Kjær, E. T. S. *et al.* In Situ Studies of the Formation of Tungsten and Niobium Oxide Nanoparticles: Towards Automated Analysis of Reaction Pathways from PDF Analysis using the Pearson Correlation Coefficient. *Chem. Methods* **2**, e202200034 (2022). <https://doi.org/10.1002/cmtd.202200034>
- 11 Juhas, P., Davis, T., Farrow, C. L. & Billinge, S. J. L. PDFgetX3: a rapid and highly automatable program for processing powder diffraction data into total scattering pair distribution functions. *J. Appl. Cryst.* **46**, 560-566 (2013). <https://doi.org/10.1107/S0021889813005190>
- 12 Yang, X., Juhas, P., Farrow, C. L. & Billinge, S. J. xPDFsuite: an end-to-end software solution for high throughput pair distribution function transformation, visualization and analysis. *arXiv preprint arXiv:1402.3163* (2014).
- 13 Becker, J. *et al.* Experimental setup for in situ X-ray SAXS/WAXS/PDF studies of the formation and growth of nanoparticles in near-and supercritical fluids. *J. Appl. Cryst.* **43**, 729-736 (2010). <https://doi.org/10.1107/S0021889810014688>
- 14 Chupas, P. J., Qiu, X., Hanson, J. C., Lee, P. L., Grey, C. P. & Billinge, S. J. Rapid-acquisition pair distribution function (RA-PDF) analysis. *J. Appl. Cryst.* **36**, 1342-1347 (2003). <https://doi.org/10.1107/S0021889803017564>
- 15 Hammersley, A. FIT2D: an introduction and overview. *European synchrotron radiation facility internal report ESRF97HA02T* **68**, 58 (1997).
- 16 Ashiotis, G. *et al.* The fast azimuthal integration Python library: pyFAI. *J. Appl. Cryst.* **48**, 510-519 (2015). <https://doi.org/10.1107/S1600576715004306>
- 17 Qiu, X., Thompson, J. W. & Billinge, S. J. L. PDFgetX2: a GUI-driven program to obtain the pair distribution function from X-ray powder diffraction data. *J. Appl. Cryst.* **37**, 678-678 (2004). <https://doi.org/10.1107/S0021889804011744>

- 18 Dykhne, T., Taylor, R., Florence, A. & Billinge, S. J. L. Data Requirements for the Reliable Use of Atomic Pair Distribution Functions in Amorphous Pharmaceutical Fingerprinting. *Pharm. Res.* **28**, 1041-1048 (2011). <https://doi.org:10.1007/s11095-010-0350-0>
